# Supplementary material for: Social media network public opinion emotion classification method based on multi-feature fusion and multi-scale hybrid neural network
Source: PeerJ Comput Sci. 2025 Jan 28;11:e2643. doi: 10.7717/peerj-cs.2643 (PMC11784739; doi:10.7717/peerj-cs.2643)
Supplement: Supplemental Information 2 [file peerj-cs-11-2643-s002.xlsx]

## Sheet: NYC_Social_Media_Usage
Agency	Platform	Url	Date Sampled	Likes/Followers/Visits/Downloads
311	WordPress	http://311nyc.wordpress.com/	2011-08-08	100
311	WordPress	http://311nyc.wordpress.com/	2011-09-22	100
311	WordPress	http://311nyc.wordpress.com/	2011-10-04
311	WordPress	http://311nyc.wordpress.com/	2011-10-27
311	WordPress	http://311nyc.wordpress.com/	2011-11-17
311	WordPress	http://311nyc.wordpress.com/	2012-12-12
311	WordPress	http://311nyc.wordpress.com/	2011-12-30
311	WordPress	http://311nyc.wordpress.com/	2012-01-20
311	WordPress	http://311nyc.wordpress.com/	2012-02-17
311	WordPress	http://311nyc.wordpress.com/	2012-03-14
311	WordPress	http://311nyc.wordpress.com/	2012-04-09
311	WordPress	http://311nyc.wordpress.com/	2012-04-30
311	WordPress	http://311nyc.wordpress.com/	2012-05-09
311	WordPress	http://311nyc.wordpress.com/	2012-06-13
311	WordPress	http://311nyc.wordpress.com/	2012-07-05
311	WordPress	http://311nyc.wordpress.com/	2012-08-02
311	WordPress	http://311nyc.wordpress.com/	2012-09-21
311	WordPress	http://311nyc.wordpress.com/	2012-10-24
311	WordPress	http://311nyc.wordpress.com/	2012-11-02
311	WordPress	http://311nyc.wordpress.com/	2012-11-09
311	iPhone App	http://itunes.apple.com/us/app/nyc-311/id324897619?mt=8	2011-08-08	16879
311	iPhone App	http://itunes.apple.com/us/app/nyc-311/id324897619?mt=8	2011-09-22
311	iPhone App	http://itunes.apple.com/us/app/nyc-311/id324897619?mt=8	2011-10-04
311	iPhone App	http://itunes.apple.com/us/app/nyc-311/id324897619?mt=8	2011-10-27
311	iPhone App	http://itunes.apple.com/us/app/nyc-311/id324897619?mt=8	2011-11-17	16879
311	iPhone App	http://itunes.apple.com/us/app/nyc-311/id324897619?mt=8	2012-12-12	16879
311	iPhone App	http://itunes.apple.com/us/app/nyc-311/id324897619?mt=8	2011-12-30	16879
311	iPhone App	http://itunes.apple.com/us/app/nyc-311/id324897619?mt=8	2012-01-20	16879
311	iPhone App	http://itunes.apple.com/us/app/nyc-311/id324897619?mt=8	2012-02-17	16879
311	iPhone App	http://itunes.apple.com/us/app/nyc-311/id324897619?mt=8	2012-03-14	16879
311	iPhone App	http://itunes.apple.com/us/app/nyc-311/id324897619?mt=8	2012-04-09	16879
311	iPhone App	http://itunes.apple.com/us/app/nyc-311/id324897619?mt=8	2012-04-30	24806
311	iPhone App	http://itunes.apple.com/us/app/nyc-311/id324897619?mt=8	2012-05-09	24806
311	iPhone App	http://itunes.apple.com/us/app/nyc-311/id324897619?mt=8	2012-06-13	25442
311	iPhone App	http://itunes.apple.com/us/app/nyc-311/id324897619?mt=8	2012-07-05	25736
311	iPhone App	http://itunes.apple.com/us/app/nyc-311/id324897619?mt=8	2012-08-02	25736
311	iPhone App	http://itunes.apple.com/us/app/nyc-311/id324897619?mt=8	2012-09-21	26581
311	iPhone App	http://itunes.apple.com/us/app/nyc-311/id324897619?mt=8	2012-10-24	26581
311	iPhone App	http://itunes.apple.com/us/app/nyc-311/id324897619?mt=8	2012-11-02	26581
311	iPhone App	http://itunes.apple.com/us/app/nyc-311/id324897619?mt=8	2012-11-09	26581
311	Facebook	http://www.facebook.com/pages/New-York-City-311/84372567650	2011-08-08	1078
311	Facebook	http://www.facebook.com/pages/New-York-City-311/84372567650	2011-09-22	1228
311	Facebook	http://www.facebook.com/pages/New-York-City-311/84372567650	2011-10-04	1246
311	Facebook	http://www.facebook.com/pages/New-York-City-311/84372567650	2011-10-27	1272
311	Facebook	http://www.facebook.com/pages/New-York-City-311/84372567650	2011-11-17	1295
311	Facebook	http://www.facebook.com/pages/New-York-City-311/84372567650	2012-12-12	1323
311	Facebook	http://www.facebook.com/pages/New-York-City-311/84372567650	2011-12-30	1339
311	Facebook	http://www.facebook.com/pages/New-York-City-311/84372567650	2012-01-20	1363
311	Facebook	http://www.facebook.com/pages/New-York-City-311/84372567650	2012-02-17
311	Facebook	http://www.facebook.com/pages/New-York-City-311/84372567650	2012-03-14	1423
311	Facebook	http://www.facebook.com/pages/New-York-City-311/84372567650	2012-04-09	1451
311	Facebook	http://www.facebook.com/pages/New-York-City-311/84372567650	2012-04-30	1484
311	Facebook	http://www.facebook.com/pages/New-York-City-311/84372567650	2012-05-09	1495
311	Facebook	http://www.facebook.com/pages/New-York-City-311/84372567650	2012-06-13	1540
311	Facebook	http://www.facebook.com/pages/New-York-City-311/84372567650	2012-07-05	1581
311	Facebook	http://www.facebook.com/pages/New-York-City-311/84372567650	2012-08-02	1619
311	Facebook	http://www.facebook.com/pages/New-York-City-311/84372567650	2012-09-21	1699
311	Facebook	http://www.facebook.com/pages/New-York-City-311/84372567650	2012-10-24	1760
311	Facebook	http://www.facebook.com/pages/New-York-City-311/84372567650	2012-11-02	1921
311	Facebook	http://www.facebook.com/pages/New-York-City-311/84372567650	2012-11-09	1987
311	Twitter	http://www.twitter.com/311NYC	2011-08-08	17956
311	Twitter	http://www.twitter.com/311NYC	2011-09-22	21077
311	Twitter	http://www.twitter.com/311NYC	2011-10-04
311	Twitter	http://www.twitter.com/311NYC	2011-10-27	22047
311	Twitter	http://www.twitter.com/311NYC	2011-11-17	22730
311	Twitter	http://www.twitter.com/311NYC	2012-12-12	23500
311	Twitter	http://www.twitter.com/311NYC	2011-12-30	23990
311	Twitter	http://www.twitter.com/311NYC	2012-01-20	24571
311	Twitter	http://www.twitter.com/311NYC	2012-02-17	25453
311	Twitter	http://www.twitter.com/311NYC	2012-03-14	26234
311	Twitter	http://www.twitter.com/311NYC	2012-04-09	26934
311	Twitter	http://www.twitter.com/311NYC	2012-04-30	27616
311	Twitter	http://www.twitter.com/311NYC	2012-05-09	27847
311	Twitter	http://www.twitter.com/311NYC	2012-06-13	29176
311	Twitter	http://www.twitter.com/311NYC	2012-07-05	29922
311	Twitter	http://www.twitter.com/311NYC	2012-08-02	30807
311	Twitter	http://www.twitter.com/311NYC	2012-09-21	32529
311	Twitter	http://www.twitter.com/311NYC	2012-10-24	33592
311	Twitter	http://www.twitter.com/311NYC	2012-11-02	36908
311	Twitter	http://www.twitter.com/311NYC	2012-11-09	38011
311	Twitter	http://www.twitter.com/NYCASP	2011-08-08	6677
311	Twitter	http://www.twitter.com/NYCASP	2011-09-22	7787
311	Twitter	http://www.twitter.com/NYCASP	2011-10-04
311	Twitter	http://www.twitter.com/NYCASP	2011-10-27	8275
311	Twitter	http://www.twitter.com/NYCASP	2011-11-17	8691
311	Twitter	http://www.twitter.com/NYCASP	2012-12-12	8929
311	Twitter	http://www.twitter.com/NYCASP	2011-12-30	9097
311	Twitter	http://www.twitter.com/NYCASP	2012-01-20	9360
311	Twitter	http://www.twitter.com/NYCASP	2012-02-17	9809
311	Twitter	http://www.twitter.com/NYCASP	2012-03-14	10139
311	Twitter	http://www.twitter.com/NYCASP	2012-04-09	10391
311	Twitter	http://www.twitter.com/NYCASP	2012-04-30	10562
311	Twitter	http://www.twitter.com/NYCASP	2012-05-09	10622
311	Twitter	http://www.twitter.com/NYCASP	2012-06-13	10930
311	Twitter	http://www.twitter.com/NYCASP	2012-07-05	11045
311	Twitter	http://www.twitter.com/NYCASP	2012-08-02	11106
311	Twitter	http://www.twitter.com/NYCASP	2012-09-21	11457
311	Twitter	http://www.twitter.com/NYCASP	2012-10-24	11766
311	Twitter	http://www.twitter.com/NYCASP	2012-11-02	12700
311	Twitter	http://www.twitter.com/NYCASP	2012-11-09	13387
ACS	Facebook	http://www.facebook.com/FamilyConnectionsNYC	2011-08-08	290
ACS	Facebook	http://www.facebook.com/FamilyConnectionsNYC	2011-09-22	329
ACS	Facebook	http://www.facebook.com/FamilyConnectionsNYC	2011-10-04	337
ACS	Facebook	http://www.facebook.com/FamilyConnectionsNYC	2011-10-27	343
ACS	Facebook	http://www.facebook.com/FamilyConnectionsNYC	2011-11-17	352
ACS	Facebook	http://www.facebook.com/FamilyConnectionsNYC	2012-12-12	369
ACS	Facebook	http://www.facebook.com/FamilyConnectionsNYC	2011-12-30	374
ACS	Facebook	http://www.facebook.com/FamilyConnectionsNYC	2012-01-20	384
ACS	Facebook	http://www.facebook.com/FamilyConnectionsNYC	2012-02-17
ACS	Facebook	http://www.facebook.com/FamilyConnectionsNYC	2012-03-14	411
ACS	Facebook	http://www.facebook.com/FamilyConnectionsNYC	2012-04-09	425
ACS	Facebook	http://www.facebook.com/FamilyConnectionsNYC	2012-04-30	434
ACS	Facebook	http://www.facebook.com/FamilyConnectionsNYC	2012-05-09	442
ACS	Facebook	http://www.facebook.com/FamilyConnectionsNYC	2012-06-13	462
ACS	Facebook	http://www.facebook.com/FamilyConnectionsNYC	2012-07-05	475
ACS	Facebook	http://www.facebook.com/FamilyConnectionsNYC	2012-08-02	500
ACS	Facebook	http://www.facebook.com/FamilyConnectionsNYC	2012-09-21	524
ACS	Facebook	http://www.facebook.com/FamilyConnectionsNYC	2012-10-24	540
ACS	Facebook	http://www.facebook.com/FamilyConnectionsNYC	2012-11-02	553
ACS	Facebook	http://www.facebook.com/FamilyConnectionsNYC	2012-11-09	558
ACS	Linked-In	http://www.linkedin.com/companies/260392/City+of+New+York%2C+Administration+for+Children%27s+Services?trk=ncsrch_hits&goback=%2Efcs_GLHD_city+of+new+york_false_*2_*2_*2_*2_*2_*2_*2_*2_*2_*2_*2_*2	2011-08-08
ACS	Linked-In	http://www.linkedin.com/companies/260392/City+of+New+York%2C+Administration+for+Children%27s+Services?trk=ncsrch_hits&goback=%2Efcs_GLHD_city+of+new+york_false_*2_*2_*2_*2_*2_*2_*2_*2_*2_*2_*2_*2	2011-09-22
ACS	Linked-In	http://www.linkedin.com/companies/260392/City+of+New+York%2C+Administration+for+Children%27s+Services?trk=ncsrch_hits&goback=%2Efcs_GLHD_city+of+new+york_false_*2_*2_*2_*2_*2_*2_*2_*2_*2_*2_*2_*2	2011-10-04
ACS	Linked-In	http://www.linkedin.com/companies/260392/City+of+New+York%2C+Administration+for+Children%27s+Services?trk=ncsrch_hits&goback=%2Efcs_GLHD_city+of+new+york_false_*2_*2_*2_*2_*2_*2_*2_*2_*2_*2_*2_*2	2011-10-27
ACS	Linked-In	http://www.linkedin.com/companies/260392/City+of+New+York%2C+Administration+for+Children%27s+Services?trk=ncsrch_hits&goback=%2Efcs_GLHD_city+of+new+york_false_*2_*2_*2_*2_*2_*2_*2_*2_*2_*2_*2_*2	2011-11-17
ACS	Linked-In	http://www.linkedin.com/companies/260392/City+of+New+York%2C+Administration+for+Children%27s+Services?trk=ncsrch_hits&goback=%2Efcs_GLHD_city+of+new+york_false_*2_*2_*2_*2_*2_*2_*2_*2_*2_*2_*2_*2	2012-12-12
ACS	Linked-In	http://www.linkedin.com/companies/260392/City+of+New+York%2C+Administration+for+Children%27s+Services?trk=ncsrch_hits&goback=%2Efcs_GLHD_city+of+new+york_false_*2_*2_*2_*2_*2_*2_*2_*2_*2_*2_*2_*2	2011-12-30
ACS	Linked-In	http://www.linkedin.com/companies/260392/City+of+New+York%2C+Administration+for+Children%27s+Services?trk=ncsrch_hits&goback=%2Efcs_GLHD_city+of+new+york_false_*2_*2_*2_*2_*2_*2_*2_*2_*2_*2_*2_*2	2012-01-20
ACS	Linked-In	http://www.linkedin.com/companies/260392/City+of+New+York%2C+Administration+for+Children%27s+Services?trk=ncsrch_hits&goback=%2Efcs_GLHD_city+of+new+york_false_*2_*2_*2_*2_*2_*2_*2_*2_*2_*2_*2_*2	2012-02-17
ACS	Linked-In	http://www.linkedin.com/companies/260392/City+of+New+York%2C+Administration+for+Children%27s+Services?trk=ncsrch_hits&goback=%2Efcs_GLHD_city+of+new+york_false_*2_*2_*2_*2_*2_*2_*2_*2_*2_*2_*2_*2	2012-03-14
ACS	Linked-In	http://www.linkedin.com/companies/260392/City+of+New+York%2C+Administration+for+Children%27s+Services?trk=ncsrch_hits&goback=%2Efcs_GLHD_city+of+new+york_false_*2_*2_*2_*2_*2_*2_*2_*2_*2_*2_*2_*2	2012-04-09
ACS	Linked-In	http://www.linkedin.com/companies/260392/City+of+New+York%2C+Administration+for+Children%27s+Services?trk=ncsrch_hits&goback=%2Efcs_GLHD_city+of+new+york_false_*2_*2_*2_*2_*2_*2_*2_*2_*2_*2_*2_*2	2012-04-30
ACS	Linked-In	http://www.linkedin.com/companies/260392/City+of+New+York%2C+Administration+for+Children%27s+Services?trk=ncsrch_hits&goback=%2Efcs_GLHD_city+of+new+york_false_*2_*2_*2_*2_*2_*2_*2_*2_*2_*2_*2_*2	2012-05-09	917
ACS	Linked-In	http://www.linkedin.com/companies/260392/City+of+New+York%2C+Administration+for+Children%27s+Services?trk=ncsrch_hits&goback=%2Efcs_GLHD_city+of+new+york_false_*2_*2_*2_*2_*2_*2_*2_*2_*2_*2_*2_*2	2012-06-13	941
ACS	Linked-In	http://www.linkedin.com/companies/260392/City+of+New+York%2C+Administration+for+Children%27s+Services?trk=ncsrch_hits&goback=%2Efcs_GLHD_city+of+new+york_false_*2_*2_*2_*2_*2_*2_*2_*2_*2_*2_*2_*2	2012-07-05	960
ACS	Linked-In	http://www.linkedin.com/companies/260392/City+of+New+York%2C+Administration+for+Children%27s+Services?trk=ncsrch_hits&goback=%2Efcs_GLHD_city+of+new+york_false_*2_*2_*2_*2_*2_*2_*2_*2_*2_*2_*2_*2	2012-08-02	985
ACS	Linked-In	http://www.linkedin.com/companies/260392/City+of+New+York%2C+Administration+for+Children%27s+Services?trk=ncsrch_hits&goback=%2Efcs_GLHD_city+of+new+york_false_*2_*2_*2_*2_*2_*2_*2_*2_*2_*2_*2_*2	2012-09-21	1046
ACS	Linked-In	http://www.linkedin.com/companies/260392/City+of+New+York%2C+Administration+for+Children%27s+Services?trk=ncsrch_hits&goback=%2Efcs_GLHD_city+of+new+york_false_*2_*2_*2_*2_*2_*2_*2_*2_*2_*2_*2_*2	2012-10-24	1078
ACS	Linked-In	http://www.linkedin.com/companies/260392/City+of+New+York%2C+Administration+for+Children%27s+Services?trk=ncsrch_hits&goback=%2Efcs_GLHD_city+of+new+york_false_*2_*2_*2_*2_*2_*2_*2_*2_*2_*2_*2_*2	2012-11-02	1082
ACS	Linked-In	http://www.linkedin.com/companies/260392/City+of+New+York%2C+Administration+for+Children%27s+Services?trk=ncsrch_hits&goback=%2Efcs_GLHD_city+of+new+york_false_*2_*2_*2_*2_*2_*2_*2_*2_*2_*2_*2_*2	2012-11-09	1082
All	Linked-In	http://www.linkedin.com/company/2904?trk=tyah	2011-08-08
All	Linked-In	http://www.linkedin.com/company/2904?trk=tyah	2011-09-22
All	Linked-In	http://www.linkedin.com/company/2904?trk=tyah	2011-10-04
All	Linked-In	http://www.linkedin.com/company/2904?trk=tyah	2011-10-27
All	Linked-In	http://www.linkedin.com/company/2904?trk=tyah	2011-11-17
All	Linked-In	http://www.linkedin.com/company/2904?trk=tyah	2012-12-12
All	Linked-In	http://www.linkedin.com/company/2904?trk=tyah	2011-12-30
All	Linked-In	http://www.linkedin.com/company/2904?trk=tyah	2012-01-20
All	Linked-In	http://www.linkedin.com/company/2904?trk=tyah	2012-02-17
All	Linked-In	http://www.linkedin.com/company/2904?trk=tyah	2012-03-14
All	Linked-In	http://www.linkedin.com/company/2904?trk=tyah	2012-04-09
All	Linked-In	http://www.linkedin.com/company/2904?trk=tyah	2012-04-30
All	Linked-In	http://www.linkedin.com/company/2904?trk=tyah	2012-05-09	4266
All	Linked-In	http://www.linkedin.com/company/2904?trk=tyah	2012-06-13	4391
All	Linked-In	http://www.linkedin.com/company/2904?trk=tyah	2012-07-05	4480
All	Linked-In	http://www.linkedin.com/company/2904?trk=tyah	2012-08-02	4565
All	Linked-In	http://www.linkedin.com/company/2904?trk=tyah	2012-09-21	4767
All	Linked-In	http://www.linkedin.com/company/2904?trk=tyah	2012-10-24	3254
All	Linked-In	http://www.linkedin.com/company/2904?trk=tyah	2012-11-02	3275
All	Linked-In	http://www.linkedin.com/company/2904?trk=tyah	2012-11-09	3275
CAU	Facebook	http://www.facebook.com/NYCMayorsCAU	2011-08-08	234
CAU	Facebook	http://www.facebook.com/NYCMayorsCAU	2011-09-22	257
CAU	Facebook	http://www.facebook.com/NYCMayorsCAU	2011-10-04	266
CAU	Facebook	http://www.facebook.com/NYCMayorsCAU	2011-10-27	275
CAU	Facebook	http://www.facebook.com/NYCMayorsCAU	2011-11-17	280
CAU	Facebook	http://www.facebook.com/NYCMayorsCAU	2012-12-12	289
CAU	Facebook	http://www.facebook.com/NYCMayorsCAU	2011-12-30	292
CAU	Facebook	http://www.facebook.com/NYCMayorsCAU	2012-01-20	300
CAU	Facebook	http://www.facebook.com/NYCMayorsCAU	2012-02-17
CAU	Facebook	http://www.facebook.com/NYCMayorsCAU	2012-03-14	336
CAU	Facebook	http://www.facebook.com/NYCMayorsCAU	2012-04-09	350
CAU	Facebook	http://www.facebook.com/NYCMayorsCAU	2012-04-30	363
CAU	Facebook	http://www.facebook.com/NYCMayorsCAU	2012-05-09	371
CAU	Facebook	http://www.facebook.com/NYCMayorsCAU	2012-06-13	416
CAU	Facebook	http://www.facebook.com/NYCMayorsCAU	2012-07-05	431
CAU	Facebook	http://www.facebook.com/NYCMayorsCAU	2012-08-02	456
CAU	Facebook	http://www.facebook.com/NYCMayorsCAU	2012-09-21	491
CAU	Facebook	http://www.facebook.com/NYCMayorsCAU	2012-10-24	527
CAU	Facebook	http://www.facebook.com/NYCMayorsCAU	2012-11-02	551
CAU	Facebook	http://www.facebook.com/NYCMayorsCAU	2012-11-09	560
CAU	Twitter	www.twitter.com/mayorscau	2011-08-08	969
CAU	Twitter	www.twitter.com/mayorscau	2011-09-22	1262
CAU	Twitter	www.twitter.com/mayorscau	2011-10-04
CAU	Twitter	www.twitter.com/mayorscau	2011-10-27	1377
CAU	Twitter	www.twitter.com/mayorscau	2011-11-17	1449
CAU	Twitter	www.twitter.com/mayorscau	2012-12-12	1503
CAU	Twitter	www.twitter.com/mayorscau	2011-12-30	1547
CAU	Twitter	www.twitter.com/mayorscau	2012-01-20	1605
CAU	Twitter	www.twitter.com/mayorscau	2012-02-17	1700
CAU	Twitter	www.twitter.com/mayorscau	2012-03-14	1757
CAU	Twitter	www.twitter.com/mayorscau	2012-04-09	1821
CAU	Twitter	www.twitter.com/mayorscau	2012-04-30	1872
CAU	Twitter	www.twitter.com/mayorscau	2012-05-09	1889
CAU	Twitter	www.twitter.com/mayorscau	2012-06-13	1983
CAU	Twitter	www.twitter.com/mayorscau	2012-07-05	2043
CAU	Twitter	www.twitter.com/mayorscau	2012-08-02	2094
CAU	Twitter	www.twitter.com/mayorscau	2012-09-21	2285
CAU	Twitter	www.twitter.com/mayorscau	2012-10-24	2389
CAU	Twitter	www.twitter.com/mayorscau	2012-11-02	2507
CAU	Twitter	www.twitter.com/mayorscau	2012-11-09	2585
CCRB	Facebook	https://www.facebook.com/home.php#!/pages/NYC-Civilian-Complaint-Review-Board/152765208087880	2011-08-08
CCRB	Facebook	https://www.facebook.com/home.php#!/pages/NYC-Civilian-Complaint-Review-Board/152765208087880	2011-09-22
CCRB	Facebook	https://www.facebook.com/home.php#!/pages/NYC-Civilian-Complaint-Review-Board/152765208087880	2011-10-04
CCRB	Facebook	https://www.facebook.com/home.php#!/pages/NYC-Civilian-Complaint-Review-Board/152765208087880	2011-10-27	11
CCRB	Facebook	https://www.facebook.com/home.php#!/pages/NYC-Civilian-Complaint-Review-Board/152765208087880	2011-11-17	12
CCRB	Facebook	https://www.facebook.com/home.php#!/pages/NYC-Civilian-Complaint-Review-Board/152765208087880	2012-12-12	13
CCRB	Facebook	https://www.facebook.com/home.php#!/pages/NYC-Civilian-Complaint-Review-Board/152765208087880	2011-12-30	13
CCRB	Facebook	https://www.facebook.com/home.php#!/pages/NYC-Civilian-Complaint-Review-Board/152765208087880	2012-01-20	13
CCRB	Facebook	https://www.facebook.com/home.php#!/pages/NYC-Civilian-Complaint-Review-Board/152765208087880	2012-02-17
CCRB	Facebook	https://www.facebook.com/home.php#!/pages/NYC-Civilian-Complaint-Review-Board/152765208087880	2012-03-14	13
CCRB	Facebook	https://www.facebook.com/home.php#!/pages/NYC-Civilian-Complaint-Review-Board/152765208087880	2012-04-09	14
CCRB	Facebook	https://www.facebook.com/home.php#!/pages/NYC-Civilian-Complaint-Review-Board/152765208087880	2012-04-30	14
CCRB	Facebook	https://www.facebook.com/home.php#!/pages/NYC-Civilian-Complaint-Review-Board/152765208087880	2012-05-09	15
CCRB	Facebook	https://www.facebook.com/home.php#!/pages/NYC-Civilian-Complaint-Review-Board/152765208087880	2012-06-13	18
CCRB	Facebook	https://www.facebook.com/home.php#!/pages/NYC-Civilian-Complaint-Review-Board/152765208087880	2012-07-05	19
CCRB	Facebook	https://www.facebook.com/home.php#!/pages/NYC-Civilian-Complaint-Review-Board/152765208087880	2012-08-02	20
CCRB	Facebook	https://www.facebook.com/home.php#!/pages/NYC-Civilian-Complaint-Review-Board/152765208087880	2012-09-21	20
CCRB	Facebook	https://www.facebook.com/home.php#!/pages/NYC-Civilian-Complaint-Review-Board/152765208087880	2012-10-24	20
CCRB	Facebook	https://www.facebook.com/home.php#!/pages/NYC-Civilian-Complaint-Review-Board/152765208087880	2012-11-02	20
CCRB	Facebook	https://www.facebook.com/home.php#!/pages/NYC-Civilian-Complaint-Review-Board/152765208087880	2012-11-09	20
Change by Us	Twitter	www.twitter.com/ChangebyUs_NYC	2011-08-08
Change by Us	Twitter	www.twitter.com/ChangebyUs_NYC	2011-09-22
Change by Us	Twitter	www.twitter.com/ChangebyUs_NYC	2011-10-04
Change by Us	Twitter	www.twitter.com/ChangebyUs_NYC	2011-10-27	588
Change by Us	Twitter	www.twitter.com/ChangebyUs_NYC	2011-11-17	639
Change by Us	Twitter	www.twitter.com/ChangebyUs_NYC	2012-12-12	706
Change by Us	Twitter	www.twitter.com/ChangebyUs_NYC	2011-12-30	747
Change by Us	Twitter	www.twitter.com/ChangebyUs_NYC	2012-01-20	808
Change by Us	Twitter	www.twitter.com/ChangebyUs_NYC	2012-02-17	887
Change by Us	Twitter	www.twitter.com/ChangebyUs_NYC	2012-03-14	977
Change by Us	Twitter	www.twitter.com/ChangebyUs_NYC	2012-04-09	1058
Change by Us	Twitter	www.twitter.com/ChangebyUs_NYC	2012-04-30	1128
Change by Us	Twitter	www.twitter.com/ChangebyUs_NYC	2012-05-09	1145
Change by Us	Twitter	www.twitter.com/ChangebyUs_NYC	2012-06-13	1248
Change by Us	Twitter	www.twitter.com/ChangebyUs_NYC	2012-07-05	1293
Change by Us	Twitter	www.twitter.com/ChangebyUs_NYC	2012-08-02	1339
Change by Us	Twitter	www.twitter.com/ChangebyUs_NYC	2012-09-21	1428
Change by Us	Twitter	www.twitter.com/ChangebyUs_NYC	2012-10-24	1476
Change by Us	Twitter	www.twitter.com/ChangebyUs_NYC	2012-11-02	1513
Change by Us	Twitter	www.twitter.com/ChangebyUs_NYC	2012-11-09	1532
Child Services	Youtube	http://www.youtube.com/user/childservices	2011-08-08
Child Services	Youtube	http://www.youtube.com/user/childservices	2011-09-22
Child Services	Youtube	http://www.youtube.com/user/childservices	2011-10-04
Child Services	Youtube	http://www.youtube.com/user/childservices	2011-10-27
Child Services	Youtube	http://www.youtube.com/user/childservices	2011-11-17
Child Services	Youtube	http://www.youtube.com/user/childservices	2012-12-12
Child Services	Youtube	http://www.youtube.com/user/childservices	2011-12-30
Child Services	Youtube	http://www.youtube.com/user/childservices	2012-01-20
Child Services	Youtube	http://www.youtube.com/user/childservices	2012-02-17
Child Services	Youtube	http://www.youtube.com/user/childservices	2012-03-14
Child Services	Youtube	http://www.youtube.com/user/childservices	2012-04-09
Child Services	Youtube	http://www.youtube.com/user/childservices	2012-04-30
Child Services	Youtube	http://www.youtube.com/user/childservices	2012-05-09
Child Services	Youtube	http://www.youtube.com/user/childservices	2012-06-13	6
Child Services	Youtube	http://www.youtube.com/user/childservices	2012-07-05	7
Child Services	Youtube	http://www.youtube.com/user/childservices	2012-08-02	9
Child Services	Youtube	http://www.youtube.com/user/childservices	2012-09-21	10
Child Services	Youtube	http://www.youtube.com/user/childservices	2012-10-24	11
Child Services	Youtube	http://www.youtube.com/user/childservices	2012-11-02	12
Child Services	Youtube	http://www.youtube.com/user/childservices	2012-11-09	12
City Charter	Twitter	http://twitter.com/CityCharterNYC	2011-08-08	468
City Charter	Twitter	http://twitter.com/CityCharterNYC	2011-09-22	541
City Charter	Twitter	http://twitter.com/CityCharterNYC	2011-10-04
City Charter	Twitter	http://twitter.com/CityCharterNYC	2011-10-27	575
City Charter	Twitter	http://twitter.com/CityCharterNYC	2011-11-17	595
City Charter	Twitter	http://twitter.com/CityCharterNYC	2012-12-12	613
City Charter	Twitter	http://twitter.com/CityCharterNYC	2011-12-30	630
City Charter	Twitter	http://twitter.com/CityCharterNYC	2012-01-20	649
City Charter	Twitter	http://twitter.com/CityCharterNYC	2012-02-17	666
City Charter	Twitter	http://twitter.com/CityCharterNYC	2012-03-14	690
City Charter	Twitter	http://twitter.com/CityCharterNYC	2012-04-09	715
City Charter	Twitter	http://twitter.com/CityCharterNYC	2012-04-30	739
City Charter	Twitter	http://twitter.com/CityCharterNYC	2012-05-09	751
City Charter	Twitter	http://twitter.com/CityCharterNYC	2012-06-13	787
City Charter	Twitter	http://twitter.com/CityCharterNYC	2012-07-05	805
City Charter	Twitter	http://twitter.com/CityCharterNYC	2012-08-02	823
City Charter	Twitter	http://twitter.com/CityCharterNYC	2012-09-21	867
City Charter	Twitter	http://twitter.com/CityCharterNYC	2012-10-24	878
City Charter	Twitter	http://twitter.com/CityCharterNYC	2012-11-02	888
City Charter	Twitter	http://twitter.com/CityCharterNYC	2012-11-09	890
City Charter	Facebook	http://www.facebook.com/pages/New-York-NY/NYC-Charter-Revision-Commission/110528715643388	2011-08-08	287
City Charter	Facebook	http://www.facebook.com/pages/New-York-NY/NYC-Charter-Revision-Commission/110528715643388	2011-09-22	286
City Charter	Facebook	http://www.facebook.com/pages/New-York-NY/NYC-Charter-Revision-Commission/110528715643388	2011-10-04	285
City Charter	Facebook	http://www.facebook.com/pages/New-York-NY/NYC-Charter-Revision-Commission/110528715643388	2011-10-27	284
City Charter	Facebook	http://www.facebook.com/pages/New-York-NY/NYC-Charter-Revision-Commission/110528715643388	2011-11-17	284
City Charter	Facebook	http://www.facebook.com/pages/New-York-NY/NYC-Charter-Revision-Commission/110528715643388	2012-12-12	284
City Charter	Facebook	http://www.facebook.com/pages/New-York-NY/NYC-Charter-Revision-Commission/110528715643388	2011-12-30	283
City Charter	Facebook	http://www.facebook.com/pages/New-York-NY/NYC-Charter-Revision-Commission/110528715643388	2012-01-20	284
City Charter	Facebook	http://www.facebook.com/pages/New-York-NY/NYC-Charter-Revision-Commission/110528715643388	2012-02-17
City Charter	Facebook	http://www.facebook.com/pages/New-York-NY/NYC-Charter-Revision-Commission/110528715643388	2012-03-14	285
City Charter	Facebook	http://www.facebook.com/pages/New-York-NY/NYC-Charter-Revision-Commission/110528715643388	2012-04-09	287
City Charter	Facebook	http://www.facebook.com/pages/New-York-NY/NYC-Charter-Revision-Commission/110528715643388	2012-04-30	289
City Charter	Facebook	http://www.facebook.com/pages/New-York-NY/NYC-Charter-Revision-Commission/110528715643388	2012-05-09	289
City Charter	Facebook	http://www.facebook.com/pages/New-York-NY/NYC-Charter-Revision-Commission/110528715643388	2012-06-13	289
City Charter	Facebook	http://www.facebook.com/pages/New-York-NY/NYC-Charter-Revision-Commission/110528715643388	2012-07-05	289
City Charter	Facebook	http://www.facebook.com/pages/New-York-NY/NYC-Charter-Revision-Commission/110528715643388	2012-08-02	290
City Charter	Facebook	http://www.facebook.com/pages/New-York-NY/NYC-Charter-Revision-Commission/110528715643388	2012-09-21	292
City Charter	Facebook	http://www.facebook.com/pages/New-York-NY/NYC-Charter-Revision-Commission/110528715643388	2012-10-24	293
City Charter	Facebook	http://www.facebook.com/pages/New-York-NY/NYC-Charter-Revision-Commission/110528715643388	2012-11-02	293
City Charter	Facebook	http://www.facebook.com/pages/New-York-NY/NYC-Charter-Revision-Commission/110528715643388	2012-11-09	293
City Store	Twitter	http://twitter.com/citystorenyc	2011-08-08	38
City Store	Twitter	http://twitter.com/citystorenyc	2011-09-22	53
City Store	Twitter	http://twitter.com/citystorenyc	2011-10-04
City Store	Twitter	http://twitter.com/citystorenyc	2011-10-27	59
City Store	Twitter	http://twitter.com/citystorenyc	2011-11-17	67
City Store	Twitter	http://twitter.com/citystorenyc	2012-12-12	76
City Store	Twitter	http://twitter.com/citystorenyc	2011-12-30	100
City Store	Twitter	http://twitter.com/citystorenyc	2012-01-20	123
City Store	Twitter	http://twitter.com/citystorenyc	2012-02-17	148
City Store	Twitter	http://twitter.com/citystorenyc	2012-03-14	161
City Store	Twitter	http://twitter.com/citystorenyc	2012-04-09	193
City Store	Twitter	http://twitter.com/citystorenyc	2012-04-30	222
City Store	Twitter	http://twitter.com/citystorenyc	2012-05-09	236
City Store	Twitter	http://twitter.com/citystorenyc	2012-06-13	271
City Store	Twitter	http://twitter.com/citystorenyc	2012-07-05	287
City Store	Twitter	http://twitter.com/citystorenyc	2012-08-02	311
City Store	Twitter	http://twitter.com/citystorenyc	2012-09-21	365
City Store	Twitter	http://twitter.com/citystorenyc	2012-10-24	445
City Store	Twitter	http://twitter.com/citystorenyc	2012-11-02	481
City Store	Twitter	http://twitter.com/citystorenyc	2012-11-09	494
City Store	Facebook	http://www.facebook.com/citystorenyc	2011-08-08	119
City Store	Facebook	http://www.facebook.com/citystorenyc	2011-09-22	144
City Store	Facebook	http://www.facebook.com/citystorenyc	2011-10-04	146
City Store	Facebook	http://www.facebook.com/citystorenyc	2011-10-27	151
City Store	Facebook	http://www.facebook.com/citystorenyc	2011-11-17	157
City Store	Facebook	http://www.facebook.com/citystorenyc	2012-12-12	168
City Store	Facebook	http://www.facebook.com/citystorenyc	2011-12-30	170
City Store	Facebook	http://www.facebook.com/citystorenyc	2012-01-20	190
City Store	Facebook	http://www.facebook.com/citystorenyc	2012-02-17
City Store	Facebook	http://www.facebook.com/citystorenyc	2012-03-14	207
City Store	Facebook	http://www.facebook.com/citystorenyc	2012-04-09	214
City Store	Facebook	http://www.facebook.com/citystorenyc	2012-04-30	222
City Store	Facebook	http://www.facebook.com/citystorenyc	2012-05-09	224
City Store	Facebook	http://www.facebook.com/citystorenyc	2012-06-13	254
City Store	Facebook	http://www.facebook.com/citystorenyc	2012-07-05	261
City Store	Facebook	http://www.facebook.com/citystorenyc	2012-08-02	280
City Store	Facebook	http://www.facebook.com/citystorenyc	2012-09-21	311
City Store	Facebook	http://www.facebook.com/citystorenyc	2012-10-24	326
City Store	Facebook	http://www.facebook.com/citystorenyc	2012-11-02	339
City Store	Facebook	http://www.facebook.com/citystorenyc	2012-11-09	348
Commission on Human Rights	Facebook	http://www.facebook.com/NYCCommissionOnHumanRights	2011-08-08
Commission on Human Rights	Facebook	http://www.facebook.com/NYCCommissionOnHumanRights	2011-09-22
Commission on Human Rights	Facebook	http://www.facebook.com/NYCCommissionOnHumanRights	2011-10-04
Commission on Human Rights	Facebook	http://www.facebook.com/NYCCommissionOnHumanRights	2011-10-27
Commission on Human Rights	Facebook	http://www.facebook.com/NYCCommissionOnHumanRights	2011-11-17
Commission on Human Rights	Facebook	http://www.facebook.com/NYCCommissionOnHumanRights	2012-12-12
Commission on Human Rights	Facebook	http://www.facebook.com/NYCCommissionOnHumanRights	2011-12-30
Commission on Human Rights	Facebook	http://www.facebook.com/NYCCommissionOnHumanRights	2012-01-20
Commission on Human Rights	Facebook	http://www.facebook.com/NYCCommissionOnHumanRights	2012-02-17
Commission on Human Rights	Facebook	http://www.facebook.com/NYCCommissionOnHumanRights	2012-03-14
Commission on Human Rights	Facebook	http://www.facebook.com/NYCCommissionOnHumanRights	2012-04-09	47
Commission on Human Rights	Facebook	http://www.facebook.com/NYCCommissionOnHumanRights	2012-04-30	58
Commission on Human Rights	Facebook	http://www.facebook.com/NYCCommissionOnHumanRights	2012-05-09	62
Commission on Human Rights	Facebook	http://www.facebook.com/NYCCommissionOnHumanRights	2012-06-13	76
Commission on Human Rights	Facebook	http://www.facebook.com/NYCCommissionOnHumanRights	2012-07-05	107
Commission on Human Rights	Facebook	http://www.facebook.com/NYCCommissionOnHumanRights	2012-08-02	118
Commission on Human Rights	Facebook	http://www.facebook.com/NYCCommissionOnHumanRights	2012-09-21	126
Commission on Human Rights	Facebook	http://www.facebook.com/NYCCommissionOnHumanRights	2012-10-24	134
Commission on Human Rights	Facebook	http://www.facebook.com/NYCCommissionOnHumanRights	2012-11-02	143
Commission on Human Rights	Facebook	http://www.facebook.com/NYCCommissionOnHumanRights	2012-11-09	150
Culture	Facebook	https://www.facebook.com/piypnyc	2011-08-08	656
Culture	Facebook	https://www.facebook.com/piypnyc	2011-09-22	676
Culture	Facebook	https://www.facebook.com/piypnyc	2011-10-04	681
Culture	Facebook	https://www.facebook.com/piypnyc	2011-10-27	689
Culture	Facebook	https://www.facebook.com/piypnyc	2011-11-17	693
Culture	Facebook	https://www.facebook.com/piypnyc	2012-12-12	698
Culture	Facebook	https://www.facebook.com/piypnyc	2011-12-30	703
Culture	Facebook	https://www.facebook.com/piypnyc	2012-01-20	708
Culture	Facebook	https://www.facebook.com/piypnyc	2012-02-17	719
Culture	Facebook	https://www.facebook.com/piypnyc	2012-03-14	747
Culture	Facebook	https://www.facebook.com/piypnyc	2012-04-09	816
Culture	Facebook	https://www.facebook.com/piypnyc	2012-04-30
Culture	Facebook	https://www.facebook.com/piypnyc	2012-05-09	964
Culture	Facebook	https://www.facebook.com/piypnyc	2012-06-13	994
Culture	Facebook	https://www.facebook.com/piypnyc	2012-07-05	1015
Culture	Facebook	https://www.facebook.com/piypnyc	2012-08-02	1039
Culture	Facebook	https://www.facebook.com/piypnyc	2012-09-21	1088
Culture	Facebook	https://www.facebook.com/piypnyc	2012-10-24	1125
Culture	Facebook	https://www.facebook.com/piypnyc	2012-11-02	1141
Culture	Facebook	https://www.facebook.com/piypnyc	2012-11-09	1151
DCA	Twitter	http://twitter.com/nycdca	2011-08-08	906
DCA	Twitter	http://twitter.com/nycdca	2011-09-22	1150
DCA	Twitter	http://twitter.com/nycdca	2011-10-04
DCA	Twitter	http://twitter.com/nycdca	2011-10-27	1277
DCA	Twitter	http://twitter.com/nycdca	2011-11-17	1355
DCA	Twitter	http://twitter.com/nycdca	2012-12-12	1448
DCA	Twitter	http://twitter.com/nycdca	2011-12-30	1531
DCA	Twitter	http://twitter.com/nycdca	2012-01-20	1627
DCA	Twitter	http://twitter.com/nycdca	2012-02-17	1766
DCA	Twitter	http://twitter.com/nycdca	2012-03-14	1867
DCA	Twitter	http://twitter.com/nycdca	2012-04-09	1965
DCA	Twitter	http://twitter.com/nycdca	2012-04-30	2051
DCA	Twitter	http://twitter.com/nycdca	2012-05-09	2086
DCA	Twitter	http://twitter.com/nycdca	2012-06-13	2260
DCA	Twitter	http://twitter.com/nycdca	2012-07-05	2314
DCA	Twitter	http://twitter.com/nycdca	2012-08-02	2412
DCA	Twitter	http://twitter.com/nycdca	2012-09-21	2635
DCA	Twitter	http://twitter.com/nycdca	2012-10-24	2776
DCA	Twitter	http://twitter.com/nycdca	2012-11-02	2928
DCA	Twitter	http://twitter.com/nycdca	2012-11-09	2995
DCA	Facebook	http://www.facebook.com/NYCDCA	2011-08-08	259
DCA	Facebook	http://www.facebook.com/NYCDCA	2011-09-22	331
DCA	Facebook	http://www.facebook.com/NYCDCA	2011-10-04	335
DCA	Facebook	http://www.facebook.com/NYCDCA	2011-10-27	348
DCA	Facebook	http://www.facebook.com/NYCDCA	2011-11-17	361
DCA	Facebook	http://www.facebook.com/NYCDCA	2012-12-12	370
DCA	Facebook	http://www.facebook.com/NYCDCA	2011-12-30	378
DCA	Facebook	http://www.facebook.com/NYCDCA	2012-01-20	396
DCA	Facebook	http://www.facebook.com/NYCDCA	2012-02-17
DCA	Facebook	http://www.facebook.com/NYCDCA	2012-03-14	438
DCA	Facebook	http://www.facebook.com/NYCDCA	2012-04-09	458
DCA	Facebook	http://www.facebook.com/NYCDCA	2012-04-30	482
DCA	Facebook	http://www.facebook.com/NYCDCA	2012-05-09	491
DCA	Facebook	http://www.facebook.com/NYCDCA	2012-06-13	566
DCA	Facebook	http://www.facebook.com/NYCDCA	2012-07-05	596
DCA	Facebook	http://www.facebook.com/NYCDCA	2012-08-02	628
DCA	Facebook	http://www.facebook.com/NYCDCA	2012-09-21	690
DCA	Facebook	http://www.facebook.com/NYCDCA	2012-10-24	735
DCA	Facebook	http://www.facebook.com/NYCDCA	2012-11-02	763
DCA	Facebook	http://www.facebook.com/NYCDCA	2012-11-09	772
DCA	YouTube	http://www.youtube.com/nycdca	2011-08-08
DCA	YouTube	http://www.youtube.com/nycdca	2011-09-22
DCA	YouTube	http://www.youtube.com/nycdca	2011-10-04
DCA	YouTube	http://www.youtube.com/nycdca	2011-10-27
DCA	YouTube	http://www.youtube.com/nycdca	2011-11-17
DCA	YouTube	http://www.youtube.com/nycdca	2012-12-12
DCA	YouTube	http://www.youtube.com/nycdca	2011-12-30
DCA	YouTube	http://www.youtube.com/nycdca	2012-01-20	1
DCA	YouTube	http://www.youtube.com/nycdca	2012-02-17	15
DCA	YouTube	http://www.youtube.com/nycdca	2012-03-14	16
DCA	YouTube	http://www.youtube.com/nycdca	2012-04-09	17
DCA	YouTube	http://www.youtube.com/nycdca	2012-04-30	17
DCA	YouTube	http://www.youtube.com/nycdca	2012-05-09
DCA	YouTube	http://www.youtube.com/nycdca	2012-06-13	19
DCA	YouTube	http://www.youtube.com/nycdca	2012-07-05	21
DCA	YouTube	http://www.youtube.com/nycdca	2012-08-02	25
DCA	YouTube	http://www.youtube.com/nycdca	2012-09-21	26
DCA	YouTube	http://www.youtube.com/nycdca	2012-10-24	29
DCA	YouTube	http://www.youtube.com/nycdca	2012-11-02	32
DCA	YouTube	http://www.youtube.com/nycdca	2012-11-09	32
DEP	Twitter	http://twitter.com/nycwater	2011-08-08	1497
DEP	Twitter	http://twitter.com/nycwater	2011-09-22	1904
DEP	Twitter	http://twitter.com/nycwater	2011-10-04
DEP	Twitter	http://twitter.com/nycwater	2011-10-27	2080
DEP	Twitter	http://twitter.com/nycwater	2011-11-17	2192
DEP	Twitter	http://twitter.com/nycwater	2012-12-12	2315
DEP	Twitter	http://twitter.com/nycwater	2011-12-30	2417
DEP	Twitter	http://twitter.com/nycwater	2012-01-20	2555
DEP	Twitter	http://twitter.com/nycwater	2012-02-17	2742
DEP	Twitter	http://twitter.com/nycwater	2012-03-14	2896
DEP	Twitter	http://twitter.com/nycwater	2012-04-09	3046
DEP	Twitter	http://twitter.com/nycwater	2012-04-30	3178
DEP	Twitter	http://twitter.com/nycwater	2012-05-09	3203
DEP	Twitter	http://twitter.com/nycwater	2012-06-13	3503
DEP	Twitter	http://twitter.com/nycwater	2012-07-05	3631
DEP	Twitter	http://twitter.com/nycwater	2012-08-02	3769
DEP	Twitter	http://twitter.com/nycwater	2012-09-21	4054
DEP	Twitter	http://twitter.com/nycwater	2012-10-24	4230
DEP	Twitter	http://twitter.com/nycwater	2012-11-02	4626
DEP	Twitter	http://twitter.com/nycwater	2012-11-09	4799
DEP	Facebook	http://www.facebook.com/nycwater	2011-08-08	1579
DEP	Facebook	http://www.facebook.com/nycwater	2011-09-22	1923
DEP	Facebook	http://www.facebook.com/nycwater	2011-10-04	1945
DEP	Facebook	http://www.facebook.com/nycwater	2011-10-27	2018
DEP	Facebook	http://www.facebook.com/nycwater	2011-11-17	2059
DEP	Facebook	http://www.facebook.com/nycwater	2012-12-12	2114
DEP	Facebook	http://www.facebook.com/nycwater	2011-12-30	2152
DEP	Facebook	http://www.facebook.com/nycwater	2012-01-20	2183
DEP	Facebook	http://www.facebook.com/nycwater	2012-02-17
DEP	Facebook	http://www.facebook.com/nycwater	2012-03-14	2337
DEP	Facebook	http://www.facebook.com/nycwater	2012-04-09	2423
DEP	Facebook	http://www.facebook.com/nycwater	2012-04-30	2481
DEP	Facebook	http://www.facebook.com/nycwater	2012-05-09	2505
DEP	Facebook	http://www.facebook.com/nycwater	2012-06-13	2618
DEP	Facebook	http://www.facebook.com/nycwater	2012-07-05	2704
DEP	Facebook	http://www.facebook.com/nycwater	2012-08-02	2809
DEP	Facebook	http://www.facebook.com/nycwater	2012-09-21	2982
DEP	Facebook	http://www.facebook.com/nycwater	2012-10-24	3074
DEP	Facebook	http://www.facebook.com/nycwater	2012-11-02	3172
DEP	Facebook	http://www.facebook.com/nycwater	2012-11-09	3225
DEP	Flickr	http://www.flickr.com/photos/nycep	2011-08-08
DEP	Flickr	http://www.flickr.com/photos/nycep	2011-09-22
DEP	Flickr	http://www.flickr.com/photos/nycep	2011-10-04	152437
DEP	Flickr	http://www.flickr.com/photos/nycep	2011-10-27
DEP	Flickr	http://www.flickr.com/photos/nycep	2011-11-17
DEP	Flickr	http://www.flickr.com/photos/nycep	2012-12-12
DEP	Flickr	http://www.flickr.com/photos/nycep	2011-12-30
DEP	Flickr	http://www.flickr.com/photos/nycep	2012-01-20
DEP	Flickr	http://www.flickr.com/photos/nycep	2012-02-17
DEP	Flickr	http://www.flickr.com/photos/nycep	2012-03-14
DEP	Flickr	http://www.flickr.com/photos/nycep	2012-04-09
DEP	Flickr	http://www.flickr.com/photos/nycep	2012-04-30
DEP	Flickr	http://www.flickr.com/photos/nycep	2012-05-09
DEP	Flickr	http://www.flickr.com/photos/nycep	2012-06-13
DEP	Flickr	http://www.flickr.com/photos/nycep	2012-07-05
DEP	Flickr	http://www.flickr.com/photos/nycep	2012-08-02
DEP	Flickr	http://www.flickr.com/photos/nycep	2012-09-21
DEP	Flickr	http://www.flickr.com/photos/nycep	2012-10-24
DEP	Flickr	http://www.flickr.com/photos/nycep	2012-11-02
DEP	Flickr	http://www.flickr.com/photos/nycep	2012-11-09
DCA	Linked-In	http://www.linkedin.com/company/831694?trk=tyah	2011-08-08
DCA	Linked-In	http://www.linkedin.com/company/831694?trk=tyah	2011-09-22
DCA	Linked-In	http://www.linkedin.com/company/831694?trk=tyah	2011-10-04
DCA	Linked-In	http://www.linkedin.com/company/831694?trk=tyah	2011-10-27
DCA	Linked-In	http://www.linkedin.com/company/831694?trk=tyah	2011-11-17
DCA	Linked-In	http://www.linkedin.com/company/831694?trk=tyah	2012-12-12
DCA	Linked-In	http://www.linkedin.com/company/831694?trk=tyah	2011-12-30
DCA	Linked-In	http://www.linkedin.com/company/831694?trk=tyah	2012-01-20
DCA	Linked-In	http://www.linkedin.com/company/831694?trk=tyah	2012-02-17
DCA	Linked-In	http://www.linkedin.com/company/831694?trk=tyah	2012-03-14
DCA	Linked-In	http://www.linkedin.com/company/831694?trk=tyah	2012-04-09
DCA	Linked-In	http://www.linkedin.com/company/831694?trk=tyah	2012-04-30
DCA	Linked-In	http://www.linkedin.com/company/831694?trk=tyah	2012-05-09	87
DCA	Linked-In	http://www.linkedin.com/company/831694?trk=tyah	2012-06-13	77
DCA	Linked-In	http://www.linkedin.com/company/831694?trk=tyah	2012-07-05	103
DCA	Linked-In	http://www.linkedin.com/company/831694?trk=tyah	2012-08-02	113
DCA	Linked-In	http://www.linkedin.com/company/831694?trk=tyah	2012-09-21	134
DCA	Linked-In	http://www.linkedin.com/company/831694?trk=tyah	2012-10-24	72
DCA	Linked-In	http://www.linkedin.com/company/831694?trk=tyah	2012-11-02	71
DCA	Linked-In	http://www.linkedin.com/company/831694?trk=tyah	2012-11-09	71
DFTA (aging)	Twitter	http://twitter.com/NYCaging	2011-08-08	123
DFTA (aging)	Twitter	http://twitter.com/NYCaging	2011-09-22	222
DFTA (aging)	Twitter	http://twitter.com/NYCaging	2011-10-04
DFTA (aging)	Twitter	http://twitter.com/NYCaging	2011-10-27	297
DFTA (aging)	Twitter	http://twitter.com/NYCaging	2011-11-17	347
DFTA (aging)	Twitter	http://twitter.com/NYCaging	2012-12-12	386
DFTA (aging)	Twitter	http://twitter.com/NYCaging	2011-12-30	414
DFTA (aging)	Twitter	http://twitter.com/NYCaging	2012-01-20	465
DFTA (aging)	Twitter	http://twitter.com/NYCaging	2012-02-17	504
DFTA (aging)	Twitter	http://twitter.com/NYCaging	2012-03-14	546
DFTA (aging)	Twitter	http://twitter.com/NYCaging	2012-04-09	587
DFTA (aging)	Twitter	http://twitter.com/NYCaging	2012-04-30	628
DFTA (aging)	Twitter	http://twitter.com/NYCaging	2012-05-09	3928
DFTA (aging)	Twitter	http://twitter.com/NYCaging	2012-06-13	714
DFTA (aging)	Twitter	http://twitter.com/NYCaging	2012-07-05	731
DFTA (aging)	Twitter	http://twitter.com/NYCaging	2012-08-02	751
DFTA (aging)	Twitter	http://twitter.com/NYCaging	2012-09-21	841
DFTA (aging)	Twitter	http://twitter.com/NYCaging	2012-10-24	867
DFTA (aging)	Twitter	http://twitter.com/NYCaging	2012-11-02	894
DFTA (aging)	Twitter	http://twitter.com/NYCaging	2012-11-09	917
DFTA (aging)	Facebook	http://www.facebook.com/pages/NYC-Department-for-the-Aging/109028655823590	2011-08-08	90
DFTA (aging)	Facebook	http://www.facebook.com/pages/NYC-Department-for-the-Aging/109028655823590	2011-09-22	105
DFTA (aging)	Facebook	http://www.facebook.com/pages/NYC-Department-for-the-Aging/109028655823590	2011-10-04	105
DFTA (aging)	Facebook	http://www.facebook.com/pages/NYC-Department-for-the-Aging/109028655823590	2011-10-27	109
DFTA (aging)	Facebook	http://www.facebook.com/pages/NYC-Department-for-the-Aging/109028655823590	2011-11-17	115
DFTA (aging)	Facebook	http://www.facebook.com/pages/NYC-Department-for-the-Aging/109028655823590	2012-12-12	118
DFTA (aging)	Facebook	http://www.facebook.com/pages/NYC-Department-for-the-Aging/109028655823590	2011-12-30	121
DFTA (aging)	Facebook	http://www.facebook.com/pages/NYC-Department-for-the-Aging/109028655823590	2012-01-20	134
DFTA (aging)	Facebook	http://www.facebook.com/pages/NYC-Department-for-the-Aging/109028655823590	2012-02-17	145
DFTA (aging)	Facebook	http://www.facebook.com/pages/NYC-Department-for-the-Aging/109028655823590	2012-03-14	162
DFTA (aging)	Facebook	http://www.facebook.com/pages/NYC-Department-for-the-Aging/109028655823590	2012-04-09	178
DFTA (aging)	Facebook	http://www.facebook.com/pages/NYC-Department-for-the-Aging/109028655823590	2012-04-30	186
DFTA (aging)	Facebook	http://www.facebook.com/pages/NYC-Department-for-the-Aging/109028655823590	2012-05-09	187
DFTA (aging)	Facebook	http://www.facebook.com/pages/NYC-Department-for-the-Aging/109028655823590	2012-06-13	200
DFTA (aging)	Facebook	http://www.facebook.com/pages/NYC-Department-for-the-Aging/109028655823590	2012-07-05	213
DFTA (aging)	Facebook	http://www.facebook.com/pages/NYC-Department-for-the-Aging/109028655823590	2012-08-02	228
DFTA (aging)	Facebook	http://www.facebook.com/pages/NYC-Department-for-the-Aging/109028655823590	2012-09-21	243
DFTA (aging)	Facebook	http://www.facebook.com/pages/NYC-Department-for-the-Aging/109028655823590	2012-10-24	251
DFTA (aging)	Facebook	http://www.facebook.com/pages/NYC-Department-for-the-Aging/109028655823590	2012-11-02	257
DFTA (aging)	Facebook	http://www.facebook.com/pages/NYC-Department-for-the-Aging/109028655823590	2012-11-09	261
DFTA	Facebook	http://www.facebook.com/timebanksnyc	2011-08-08	227
DFTA	Facebook	http://www.facebook.com/timebanksnyc	2011-09-22	234
DFTA	Facebook	http://www.facebook.com/timebanksnyc	2011-10-04	235
DFTA	Facebook	http://www.facebook.com/timebanksnyc	2011-10-27	238
DFTA	Facebook	http://www.facebook.com/timebanksnyc	2011-11-17	246
DFTA	Facebook	http://www.facebook.com/timebanksnyc	2012-12-12	260
DFTA	Facebook	http://www.facebook.com/timebanksnyc	2011-12-30	264
DFTA	Facebook	http://www.facebook.com/timebanksnyc	2012-01-20	269
DFTA	Facebook	http://www.facebook.com/timebanksnyc	2012-02-17	274
DFTA	Facebook	http://www.facebook.com/timebanksnyc	2012-03-14	286
DFTA	Facebook	http://www.facebook.com/timebanksnyc	2012-04-09	291
DFTA	Facebook	http://www.facebook.com/timebanksnyc	2012-04-30	305
DFTA	Facebook	http://www.facebook.com/timebanksnyc	2012-05-09	305
DFTA	Facebook	http://www.facebook.com/timebanksnyc	2012-06-13	318
DFTA	Facebook	http://www.facebook.com/timebanksnyc	2012-07-05	326
DFTA	Facebook	http://www.facebook.com/timebanksnyc	2012-08-02	318
DFTA	Facebook	http://www.facebook.com/timebanksnyc	2012-09-21	318
DFTA	Facebook	http://www.facebook.com/timebanksnyc	2012-10-24	318
DFTA	Facebook	http://www.facebook.com/timebanksnyc	2012-11-02	368
DFTA	Facebook	http://www.facebook.com/timebanksnyc	2012-11-09	372
DFTA	Twitter	http://www.twitter.com/timebanksnyc	2011-08-08	577
DFTA	Twitter	http://www.twitter.com/timebanksnyc	2011-09-22	626
DFTA	Twitter	http://www.twitter.com/timebanksnyc	2011-10-04
DFTA	Twitter	http://www.twitter.com/timebanksnyc	2011-10-27	654
DFTA	Twitter	http://www.twitter.com/timebanksnyc	2011-11-17	670
DFTA	Twitter	http://www.twitter.com/timebanksnyc	2012-12-12	687
DFTA	Twitter	http://www.twitter.com/timebanksnyc	2011-12-30	706
DFTA	Twitter	http://www.twitter.com/timebanksnyc	2012-01-20	733
DFTA	Twitter	http://www.twitter.com/timebanksnyc	2012-02-17	748
DFTA	Twitter	http://www.twitter.com/timebanksnyc	2012-03-14	778
DFTA	Twitter	http://www.twitter.com/timebanksnyc	2012-04-09	805
DFTA	Twitter	http://www.twitter.com/timebanksnyc	2012-04-30	820
DFTA	Twitter	http://www.twitter.com/timebanksnyc	2012-05-09	831
DFTA	Twitter	http://www.twitter.com/timebanksnyc	2012-06-13	866
DFTA	Twitter	http://www.twitter.com/timebanksnyc	2012-07-05	880
DFTA	Twitter	http://www.twitter.com/timebanksnyc	2012-08-02	897
DFTA	Twitter	http://www.twitter.com/timebanksnyc	2012-09-21	939
DFTA	Twitter	http://www.twitter.com/timebanksnyc	2012-10-24	942
DFTA	Twitter	http://www.twitter.com/timebanksnyc	2012-11-02	950
DFTA	Twitter	http://www.twitter.com/timebanksnyc	2012-11-09	954
DHS	Facebook	http://www.facebook.com/pages/New-York-NY/HOPE-2011/157690657606772	2011-08-08	282
DHS	Facebook	http://www.facebook.com/pages/New-York-NY/HOPE-2011/157690657606772	2011-09-22	290
DHS	Facebook	http://www.facebook.com/pages/New-York-NY/HOPE-2011/157690657606772	2011-10-04	290
DHS	Facebook	http://www.facebook.com/pages/New-York-NY/HOPE-2011/157690657606772	2011-10-27	295
DHS	Facebook	http://www.facebook.com/pages/New-York-NY/HOPE-2011/157690657606772	2011-11-17	294
DHS	Facebook	http://www.facebook.com/pages/New-York-NY/HOPE-2011/157690657606772	2012-12-12	294
DHS	Facebook	http://www.facebook.com/pages/New-York-NY/HOPE-2011/157690657606772	2011-12-30	293
DHS	Facebook	http://www.facebook.com/pages/New-York-NY/HOPE-2011/157690657606772	2012-01-20	295
DHS	Facebook	http://www.facebook.com/pages/New-York-NY/HOPE-2011/157690657606772	2012-02-17
DHS	Facebook	http://www.facebook.com/pages/New-York-NY/HOPE-2011/157690657606772	2012-03-14	302
DHS	Facebook	http://www.facebook.com/pages/New-York-NY/HOPE-2011/157690657606772	2012-04-09	302
DHS	Facebook	http://www.facebook.com/pages/New-York-NY/HOPE-2011/157690657606772	2012-04-30	303
DHS	Facebook	http://www.facebook.com/pages/New-York-NY/HOPE-2011/157690657606772	2012-05-09	303
DHS	Facebook	http://www.facebook.com/pages/New-York-NY/HOPE-2011/157690657606772	2012-06-13	304
DHS	Facebook	http://www.facebook.com/pages/New-York-NY/HOPE-2011/157690657606772	2012-07-05	303
DHS	Facebook	http://www.facebook.com/pages/New-York-NY/HOPE-2011/157690657606772	2012-08-02	305
DHS	Facebook	http://www.facebook.com/pages/New-York-NY/HOPE-2011/157690657606772	2012-09-21	305
DHS	Facebook	http://www.facebook.com/pages/New-York-NY/HOPE-2011/157690657606772	2012-10-24	306
DHS	Facebook	http://www.facebook.com/pages/New-York-NY/HOPE-2011/157690657606772	2012-11-02	311
DHS	Facebook	http://www.facebook.com/pages/New-York-NY/HOPE-2011/157690657606772	2012-11-09	314
DHS (Homeless Service)	Twitter	www.twitter.com/nycdhs	2012-06-13	389
DHS (Homeless Service)	Twitter	www.twitter.com/nycdhs	2012-08-02	431
DHS (Homeless Service)	Twitter	www.twitter.com/nycdhs	2011-08-08
DHS (Homeless Service)	Twitter	www.twitter.com/nycdhs	2011-09-22
DHS (Homeless Service)	Twitter	www.twitter.com/nycdhs	2011-10-04
DHS (Homeless Service)	Twitter	www.twitter.com/nycdhs	2011-10-27	69
DHS (Homeless Service)	Twitter	www.twitter.com/nycdhs	2011-11-17	96
DHS (Homeless Service)	Twitter	www.twitter.com/nycdhs	2012-12-12	125
DHS (Homeless Service)	Twitter	www.twitter.com/nycdhs	2011-12-30	151
DHS (Homeless Service)	Twitter	www.twitter.com/nycdhs	2012-01-20	189
DHS (Homeless Service)	Twitter	www.twitter.com/nycdhs	2012-02-17	239
DHS (Homeless Service)	Twitter	www.twitter.com/nycdhs	2012-03-14	261
DHS (Homeless Service)	Twitter	www.twitter.com/nycdhs	2012-04-09	294
DHS (Homeless Service)	Twitter	www.twitter.com/nycdhs	2012-04-30	315
DHS (Homeless Service)	Twitter	www.twitter.com/nycdhs	2012-05-09	646
DHS (Homeless Service)	Twitter	www.twitter.com/nycdhs	2012-07-05	418
DHS (Homeless Service)	Twitter	www.twitter.com/nycdhs	2012-09-21	518
DHS (Homeless Service)	Twitter	www.twitter.com/nycdhs	2012-10-24	564
DHS (Homeless Service)	Twitter	www.twitter.com/nycdhs	2012-11-02	598
DHS (Homeless Service)	Twitter	www.twitter.com/nycdhs	2012-11-09	675
DOB	Tumblr	http://nycbuildings.tumblr.com	2011-08-08
DOB	Tumblr	http://nycbuildings.tumblr.com	2011-09-22
DOB	Tumblr	http://nycbuildings.tumblr.com	2011-10-04
DOB	Tumblr	http://nycbuildings.tumblr.com	2011-10-27
DOB	Tumblr	http://nycbuildings.tumblr.com	2011-11-17
DOB	Tumblr	http://nycbuildings.tumblr.com	2012-12-12
DOB	Tumblr	http://nycbuildings.tumblr.com	2011-12-30
DOB	Tumblr	http://nycbuildings.tumblr.com	2012-01-20
DOB	Tumblr	http://nycbuildings.tumblr.com	2012-02-17
DOB	Tumblr	http://nycbuildings.tumblr.com	2012-03-14
DOB	Tumblr	http://nycbuildings.tumblr.com	2012-04-09
DOB	Tumblr	http://nycbuildings.tumblr.com	2012-04-30
DOB	Tumblr	http://nycbuildings.tumblr.com	2012-05-09
DOB	Tumblr	http://nycbuildings.tumblr.com	2012-06-13
DOB	Tumblr	http://nycbuildings.tumblr.com	2012-07-05
DOB	Tumblr	http://nycbuildings.tumblr.com	2012-08-02
DOB	Tumblr	http://nycbuildings.tumblr.com	2012-09-21
DOB	Tumblr	http://nycbuildings.tumblr.com	2012-10-24
DOB	Tumblr	http://nycbuildings.tumblr.com	2012-11-02
DOB	Tumblr	http://nycbuildings.tumblr.com	2012-11-09
DOB	Twitter	http://twitter.com/nyc_buildings	2011-08-08	1823
DOB	Twitter	http://twitter.com/nyc_buildings	2011-09-22	2318
DOB	Twitter	http://twitter.com/nyc_buildings	2011-10-04
DOB	Twitter	http://twitter.com/nyc_buildings	2011-10-27	2562
DOB	Twitter	http://twitter.com/nyc_buildings	2011-11-17	2705
DOB	Twitter	http://twitter.com/nyc_buildings	2012-12-12	2850
DOB	Twitter	http://twitter.com/nyc_buildings	2011-12-30	2953
DOB	Twitter	http://twitter.com/nyc_buildings	2012-01-20	3126
DOB	Twitter	http://twitter.com/nyc_buildings	2012-02-17	3325
DOB	Twitter	http://twitter.com/nyc_buildings	2012-03-14	3536
DOB	Twitter	http://twitter.com/nyc_buildings	2012-04-09	3703
DOB	Twitter	http://twitter.com/nyc_buildings	2012-04-30	3864
DOB	Twitter	http://twitter.com/nyc_buildings	2012-05-09	830
DOB	Twitter	http://twitter.com/nyc_buildings	2012-06-13	4170
DOB	Twitter	http://twitter.com/nyc_buildings	2012-07-05	4304
DOB	Twitter	http://twitter.com/nyc_buildings	2012-08-02	4464
DOB	Twitter	http://twitter.com/nyc_buildings	2012-09-21	4797
DOB	Twitter	http://twitter.com/nyc_buildings	2012-10-24	5005
DOB	Twitter	http://twitter.com/nyc_buildings	2012-11-02	5349
DOB	Twitter	http://twitter.com/nyc_buildings	2012-11-09	5578
DOB	Facebook	http://www.facebook.com/NYCBuildings	2011-08-08
DOB	Facebook	http://www.facebook.com/NYCBuildings	2011-09-22
DOB	Facebook	http://www.facebook.com/NYCBuildings	2011-10-04
DOB	Facebook	http://www.facebook.com/NYCBuildings	2011-10-27	804
DOB	Facebook	http://www.facebook.com/NYCBuildings	2011-11-17	824
DOB	Facebook	http://www.facebook.com/NYCBuildings	2012-12-12	853
DOB	Facebook	http://www.facebook.com/NYCBuildings	2011-12-30	876
DOB	Facebook	http://www.facebook.com/NYCBuildings	2012-01-20	895
DOB	Facebook	http://www.facebook.com/NYCBuildings	2012-02-17
DOB	Facebook	http://www.facebook.com/NYCBuildings	2012-03-14	996
DOB	Facebook	http://www.facebook.com/NYCBuildings	2012-04-09	1038
DOB	Facebook	http://www.facebook.com/NYCBuildings	2012-04-30	1070
DOB	Facebook	http://www.facebook.com/NYCBuildings	2012-05-09	1068
DOB	Facebook	http://www.facebook.com/NYCBuildings	2012-06-13	1133
DOB	Facebook	http://www.facebook.com/NYCBuildings	2012-07-05	1170
DOB	Facebook	http://www.facebook.com/NYCBuildings	2012-08-02	1215
DOB	Facebook	http://www.facebook.com/NYCBuildings	2012-09-21	1338
DOB	Facebook	http://www.facebook.com/NYCBuildings	2012-10-24	1399
DOB	Facebook	http://www.facebook.com/NYCBuildings	2012-11-02	1488
DOB	Facebook	http://www.facebook.com/NYCBuildings	2012-11-09	1517
DOB	Flickr	http://www.flickr.com/photos/nyc_buildings/	2011-08-08
DOB	Flickr	http://www.flickr.com/photos/nyc_buildings/	2011-09-22
DOB	Flickr	http://www.flickr.com/photos/nyc_buildings/	2011-10-04
DOB	Flickr	http://www.flickr.com/photos/nyc_buildings/	2011-10-27
DOB	Flickr	http://www.flickr.com/photos/nyc_buildings/	2011-11-17
DOB	Flickr	http://www.flickr.com/photos/nyc_buildings/	2012-12-12
DOB	Flickr	http://www.flickr.com/photos/nyc_buildings/	2011-12-30
DOB	Flickr	http://www.flickr.com/photos/nyc_buildings/	2012-01-20
DOB	Flickr	http://www.flickr.com/photos/nyc_buildings/	2012-02-17
DOB	Flickr	http://www.flickr.com/photos/nyc_buildings/	2012-03-14
DOB	Flickr	http://www.flickr.com/photos/nyc_buildings/	2012-04-09
DOB	Flickr	http://www.flickr.com/photos/nyc_buildings/	2012-04-30
DOB	Flickr	http://www.flickr.com/photos/nyc_buildings/	2012-05-09
DOB	Flickr	http://www.flickr.com/photos/nyc_buildings/	2012-06-13
DOB	Flickr	http://www.flickr.com/photos/nyc_buildings/	2012-07-05
DOB	Flickr	http://www.flickr.com/photos/nyc_buildings/	2012-08-02
DOB	Flickr	http://www.flickr.com/photos/nyc_buildings/	2012-09-21
DOB	Flickr	http://www.flickr.com/photos/nyc_buildings/	2012-10-24
DOB	Flickr	http://www.flickr.com/photos/nyc_buildings/	2012-11-02
DOB	Flickr	http://www.flickr.com/photos/nyc_buildings/	2012-11-09
DOB	YouTube	http://www.youtube.com/NYCBUILDINGS	2011-08-08	60
DOB	YouTube	http://www.youtube.com/NYCBUILDINGS	2011-09-22	63
DOB	YouTube	http://www.youtube.com/NYCBUILDINGS	2011-10-04	67
DOB	YouTube	http://www.youtube.com/NYCBUILDINGS	2011-10-27
DOB	YouTube	http://www.youtube.com/NYCBUILDINGS	2011-11-17	68
DOB	YouTube	http://www.youtube.com/NYCBUILDINGS	2012-12-12	72
DOB	YouTube	http://www.youtube.com/NYCBUILDINGS	2011-12-30	77
DOB	YouTube	http://www.youtube.com/NYCBUILDINGS	2012-01-20	79
DOB	YouTube	http://www.youtube.com/NYCBUILDINGS	2012-02-17	82
DOB	YouTube	http://www.youtube.com/NYCBUILDINGS	2012-03-14	85
DOB	YouTube	http://www.youtube.com/NYCBUILDINGS	2012-04-09	84
DOB	YouTube	http://www.youtube.com/NYCBUILDINGS	2012-04-30	85
DOB	YouTube	http://www.youtube.com/NYCBUILDINGS	2012-05-09
DOB	YouTube	http://www.youtube.com/NYCBUILDINGS	2012-06-13	86
DOB	YouTube	http://www.youtube.com/NYCBUILDINGS	2012-07-05	87
DOB	YouTube	http://www.youtube.com/NYCBUILDINGS	2012-08-02	90
DOB	YouTube	http://www.youtube.com/NYCBUILDINGS	2012-09-21	93
DOB	YouTube	http://www.youtube.com/NYCBUILDINGS	2012-10-24	95
DOB	YouTube	http://www.youtube.com/NYCBUILDINGS	2012-11-02	101
DOB	YouTube	http://www.youtube.com/NYCBUILDINGS	2012-11-09	101
DOB: Cool Roofs	Twitter	http://twitter.com/nycCoolRoofs	2011-08-08	270
DOB: Cool Roofs	Twitter	http://twitter.com/nycCoolRoofs	2011-09-22	391
DOB: Cool Roofs	Twitter	http://twitter.com/nycCoolRoofs	2011-10-04
DOB: Cool Roofs	Twitter	http://twitter.com/nycCoolRoofs	2011-10-27	450
DOB: Cool Roofs	Twitter	http://twitter.com/nycCoolRoofs	2011-11-17	474
DOB: Cool Roofs	Twitter	http://twitter.com/nycCoolRoofs	2012-12-12	511
DOB: Cool Roofs	Twitter	http://twitter.com/nycCoolRoofs	2011-12-30	537
DOB: Cool Roofs	Twitter	http://twitter.com/nycCoolRoofs	2012-01-20	586
DOB: Cool Roofs	Twitter	http://twitter.com/nycCoolRoofs	2012-02-17	647
DOB: Cool Roofs	Twitter	http://twitter.com/nycCoolRoofs	2012-03-14	694
DOB: Cool Roofs	Twitter	http://twitter.com/nycCoolRoofs	2012-04-09	746
DOB: Cool Roofs	Twitter	http://twitter.com/nycCoolRoofs	2012-04-30	803
DOB: Cool Roofs	Twitter	http://twitter.com/nycCoolRoofs	2012-05-09	22909
DOB: Cool Roofs	Twitter	http://twitter.com/nycCoolRoofs	2012-06-13	911
DOB: Cool Roofs	Twitter	http://twitter.com/nycCoolRoofs	2012-07-05	955
DOB: Cool Roofs	Twitter	http://twitter.com/nycCoolRoofs	2012-08-02	992
DOB: Cool Roofs	Twitter	http://twitter.com/nycCoolRoofs	2012-09-21	1092
DOB: Cool Roofs	Twitter	http://twitter.com/nycCoolRoofs	2012-10-24	1119
DOB: Cool Roofs	Twitter	http://twitter.com/nycCoolRoofs	2012-11-02	1130
DOB: Cool Roofs	Twitter	http://twitter.com/nycCoolRoofs	2012-11-09	1134
DOB: Cool Roofs	Facebook	http://www.facebook.com/coolroofs?sk=wall	2011-08-08	194
DOB: Cool Roofs	Facebook	http://www.facebook.com/coolroofs?sk=wall	2011-09-22	241
DOB: Cool Roofs	Facebook	http://www.facebook.com/coolroofs?sk=wall	2011-10-04	249
DOB: Cool Roofs	Facebook	http://www.facebook.com/coolroofs?sk=wall	2011-10-27	270
DOB: Cool Roofs	Facebook	http://www.facebook.com/coolroofs?sk=wall	2011-11-17	274
DOB: Cool Roofs	Facebook	http://www.facebook.com/coolroofs?sk=wall	2012-12-12	276
DOB: Cool Roofs	Facebook	http://www.facebook.com/coolroofs?sk=wall	2011-12-30	277
DOB: Cool Roofs	Facebook	http://www.facebook.com/coolroofs?sk=wall	2012-01-20	279
DOB: Cool Roofs	Facebook	http://www.facebook.com/coolroofs?sk=wall	2012-02-17
DOB: Cool Roofs	Facebook	http://www.facebook.com/coolroofs?sk=wall	2012-03-14	307
DOB: Cool Roofs	Facebook	http://www.facebook.com/coolroofs?sk=wall	2012-04-09	323
DOB: Cool Roofs	Facebook	http://www.facebook.com/coolroofs?sk=wall	2012-04-30	343
DOB: Cool Roofs	Facebook	http://www.facebook.com/coolroofs?sk=wall	2012-05-09	350
DOB: Cool Roofs	Facebook	http://www.facebook.com/coolroofs?sk=wall	2012-06-13	418
DOB: Cool Roofs	Facebook	http://www.facebook.com/coolroofs?sk=wall	2012-07-05	454
DOB: Cool Roofs	Facebook	http://www.facebook.com/coolroofs?sk=wall	2012-08-02	481
DOB: Cool Roofs	Facebook	http://www.facebook.com/coolroofs?sk=wall	2012-09-21	542
DOB: Cool Roofs	Facebook	http://www.facebook.com/coolroofs?sk=wall	2012-10-24	570
DOB: Cool Roofs	Facebook	http://www.facebook.com/coolroofs?sk=wall	2012-11-02	580
DOB: Cool Roofs	Facebook	http://www.facebook.com/coolroofs?sk=wall	2012-11-09	584
DOB: UrbanCanvas	Facebook	http://www.facebook.com/NYCurbancanvas	2011-08-08	200
DOB: UrbanCanvas	Facebook	http://www.facebook.com/NYCurbancanvas	2011-09-22	209
DOB: UrbanCanvas	Facebook	http://www.facebook.com/NYCurbancanvas	2011-10-04	209
DOB: UrbanCanvas	Facebook	http://www.facebook.com/NYCurbancanvas	2011-10-27	211
DOB: UrbanCanvas	Facebook	http://www.facebook.com/NYCurbancanvas	2011-11-17	212
DOB: UrbanCanvas	Facebook	http://www.facebook.com/NYCurbancanvas	2012-12-12	216
DOB: UrbanCanvas	Facebook	http://www.facebook.com/NYCurbancanvas	2011-12-30	216
DOB: UrbanCanvas	Facebook	http://www.facebook.com/NYCurbancanvas	2012-01-20	218
DOB: UrbanCanvas	Facebook	http://www.facebook.com/NYCurbancanvas	2012-02-17
DOB: UrbanCanvas	Facebook	http://www.facebook.com/NYCurbancanvas	2012-03-14	243
DOB: UrbanCanvas	Facebook	http://www.facebook.com/NYCurbancanvas	2012-04-09	247
DOB: UrbanCanvas	Facebook	http://www.facebook.com/NYCurbancanvas	2012-04-30	255
DOB: UrbanCanvas	Facebook	http://www.facebook.com/NYCurbancanvas	2012-05-09	257
DOB: UrbanCanvas	Facebook	http://www.facebook.com/NYCurbancanvas	2012-06-13	272
DOB: UrbanCanvas	Facebook	http://www.facebook.com/NYCurbancanvas	2012-07-05	280
DOB: UrbanCanvas	Facebook	http://www.facebook.com/NYCurbancanvas	2012-08-02	292
DOB: UrbanCanvas	Facebook	http://www.facebook.com/NYCurbancanvas	2012-09-21	306
DOB: UrbanCanvas	Facebook	http://www.facebook.com/NYCurbancanvas	2012-10-24	316
DOB: UrbanCanvas	Facebook	http://www.facebook.com/NYCurbancanvas	2012-11-02	321
DOB: UrbanCanvas	Facebook	http://www.facebook.com/NYCurbancanvas	2012-11-09	324
DOC	YouTube	http://www.youtube.com/user/OFFICIALNYCDOC	2011-08-08
DOC	YouTube	http://www.youtube.com/user/OFFICIALNYCDOC	2011-09-22
DOC	YouTube	http://www.youtube.com/user/OFFICIALNYCDOC	2011-10-04	0
DOC	YouTube	http://www.youtube.com/user/OFFICIALNYCDOC	2011-10-27
DOC	YouTube	http://www.youtube.com/user/OFFICIALNYCDOC	2011-11-17
DOC	YouTube	http://www.youtube.com/user/OFFICIALNYCDOC	2012-12-12
DOC	YouTube	http://www.youtube.com/user/OFFICIALNYCDOC	2011-12-30
DOC	YouTube	http://www.youtube.com/user/OFFICIALNYCDOC	2012-01-20
DOC	YouTube	http://www.youtube.com/user/OFFICIALNYCDOC	2012-02-17
DOC	YouTube	http://www.youtube.com/user/OFFICIALNYCDOC	2012-03-14
DOC	YouTube	http://www.youtube.com/user/OFFICIALNYCDOC	2012-04-09
DOC	YouTube	http://www.youtube.com/user/OFFICIALNYCDOC	2012-04-30
DOC	YouTube	http://www.youtube.com/user/OFFICIALNYCDOC	2012-05-09
DOC	YouTube	http://www.youtube.com/user/OFFICIALNYCDOC	2012-06-13	0
DOC	YouTube	http://www.youtube.com/user/OFFICIALNYCDOC	2012-07-05	0
DOC	YouTube	http://www.youtube.com/user/OFFICIALNYCDOC	2012-08-02	0
DOC	YouTube	http://www.youtube.com/user/OFFICIALNYCDOC	2012-09-21	0
DOC	YouTube	http://www.youtube.com/user/OFFICIALNYCDOC	2012-10-24	0
DOC	YouTube	http://www.youtube.com/user/OFFICIALNYCDOC	2012-11-02	0
DOC	YouTube	http://www.youtube.com/user/OFFICIALNYCDOC	2012-11-09	0
DOE	SMS	877877	2011-08-08	382
DOE	SMS	877877	2011-09-22	382
DOE	SMS	877877	2011-10-04
DOE	SMS	877877	2011-10-27
DOE	SMS	877877	2011-11-17	382
DOE	SMS	877877	2012-12-12	382
DOE	SMS	877877	2011-12-30	382
DOE	SMS	877877	2012-01-20	382
DOE	SMS	877877	2012-02-17	382
DOE	SMS	877877	2012-03-14	382
DOE	SMS	877877	2012-04-09	382
DOE	SMS	877877	2012-04-30	382
DOE	SMS	877877	2012-05-09
DOE	SMS	877877	2012-06-13	1253
DOE	SMS	877877	2012-07-05	1253
DOE	SMS	877877	2012-08-02	1253
DOE	SMS	877877	2012-09-21	1253
DOE	SMS	877877	2012-11-09	1253
DOE	SMS	877877	2012-10-24	1253
DOE	SMS	877877	2012-11-02	1253
DOE	Twitter	http://twitter.com/alumny	2011-08-08	87
DOE	Twitter	http://twitter.com/alumny	2011-09-22	102
DOE	Twitter	http://twitter.com/alumny	2011-10-04
DOE	Twitter	http://twitter.com/alumny	2011-10-27	108
DOE	Twitter	http://twitter.com/alumny	2011-11-17	116
DOE	Twitter	http://twitter.com/alumny	2012-12-12	123
DOE	Twitter	http://twitter.com/alumny	2011-12-30	128
DOE	Twitter	http://twitter.com/alumny	2012-01-20	138
DOE	Twitter	http://twitter.com/alumny	2012-02-17	145
DOE	Twitter	http://twitter.com/alumny	2012-03-14	152
DOE	Twitter	http://twitter.com/alumny	2012-04-09	153
DOE	Twitter	http://twitter.com/alumny	2012-04-30	157
DOE	Twitter	http://twitter.com/alumny	2012-05-09	160
DOE	Twitter	http://twitter.com/alumny	2012-06-13	165
DOE	Twitter	http://twitter.com/alumny	2012-07-05	169
DOE	Twitter	http://twitter.com/alumny	2012-08-02	173
DOE	Twitter	http://twitter.com/alumny	2012-09-21	188
DOE	Twitter	http://twitter.com/alumny	2012-10-24	187
DOE	Twitter	http://twitter.com/alumny	2012-11-02	193
DOE	Twitter	http://twitter.com/alumny	2012-11-09	194
DOE	Twitter	http://twitter.com/iteachnyc	2011-08-08	1151
DOE	Twitter	http://twitter.com/iteachnyc	2011-09-22	1223
DOE	Twitter	http://twitter.com/iteachnyc	2011-10-04
DOE	Twitter	http://twitter.com/iteachnyc	2011-10-27	1272
DOE	Twitter	http://twitter.com/iteachnyc	2011-11-17	1287
DOE	Twitter	http://twitter.com/iteachnyc	2012-12-12	1297
DOE	Twitter	http://twitter.com/iteachnyc	2011-12-30	1319
DOE	Twitter	http://twitter.com/iteachnyc	2012-01-20	1362
DOE	Twitter	http://twitter.com/iteachnyc	2012-02-17	1411
DOE	Twitter	http://twitter.com/iteachnyc	2012-03-14	1447
DOE	Twitter	http://twitter.com/iteachnyc	2012-04-09	1479
DOE	Twitter	http://twitter.com/iteachnyc	2012-04-30	1495
DOE	Twitter	http://twitter.com/iteachnyc	2012-05-09	1500
DOE	Twitter	http://twitter.com/iteachnyc	2012-06-13	1551
DOE	Twitter	http://twitter.com/iteachnyc	2012-07-05	1562
DOE	Twitter	http://twitter.com/iteachnyc	2012-08-02	1584
DOE	Twitter	http://twitter.com/iteachnyc	2012-09-21	1621
DOE	Twitter	http://twitter.com/iteachnyc	2012-10-24	1635
DOE	Twitter	http://twitter.com/iteachnyc	2012-11-02	1657
DOE	Twitter	http://twitter.com/iteachnyc	2012-11-09	1673
DOE	Twitter	http://twitter.com/NYCSchools	2011-08-08	14877
DOE	Twitter	http://twitter.com/NYCSchools	2011-09-22	16813
DOE	Twitter	http://twitter.com/NYCSchools	2011-10-04
DOE	Twitter	http://twitter.com/NYCSchools	2011-10-27	17920
DOE	Twitter	http://twitter.com/NYCSchools	2011-11-17	18558
DOE	Twitter	http://twitter.com/NYCSchools	2012-12-12	19088
DOE	Twitter	http://twitter.com/NYCSchools	2011-12-30	19475
DOE	Twitter	http://twitter.com/NYCSchools	2012-01-20	20091
DOE	Twitter	http://twitter.com/NYCSchools	2012-02-17	20961
DOE	Twitter	http://twitter.com/NYCSchools	2012-03-14	21632
DOE	Twitter	http://twitter.com/NYCSchools	2012-04-09	22240
DOE	Twitter	http://twitter.com/NYCSchools	2012-04-30	22751
DOE	Twitter	http://twitter.com/NYCSchools	2012-05-09	8770
DOE	Twitter	http://twitter.com/NYCSchools	2012-06-13	23731
DOE	Twitter	http://twitter.com/NYCSchools	2012-07-05	24145
DOE	Twitter	http://twitter.com/NYCSchools	2012-08-02	24739
DOE	Twitter	http://twitter.com/NYCSchools	2012-09-21	26169
DOE	Twitter	http://twitter.com/NYCSchools	2012-10-24	27117
DOE	Twitter	http://twitter.com/NYCSchools	2012-11-02	30314
DOE	Twitter	http://twitter.com/NYCSchools	2012-11-09	31533
DOE	Twitter	http://twitter.com/nyctf	2011-08-08	380
DOE	Twitter	http://twitter.com/nyctf	2011-09-22	442
DOE	Twitter	http://twitter.com/nyctf	2011-10-04
DOE	Twitter	http://twitter.com/nyctf	2011-10-27	480
DOE	Twitter	http://twitter.com/nyctf	2011-11-17	503
DOE	Twitter	http://twitter.com/nyctf	2012-12-12	523
DOE	Twitter	http://twitter.com/nyctf	2011-12-30	541
DOE	Twitter	http://twitter.com/nyctf	2012-01-20	559
DOE	Twitter	http://twitter.com/nyctf	2012-02-17	613
DOE	Twitter	http://twitter.com/nyctf	2012-03-14	668
DOE	Twitter	http://twitter.com/nyctf	2012-04-09	694
DOE	Twitter	http://twitter.com/nyctf	2012-04-30	727
DOE	Twitter	http://twitter.com/nyctf	2012-05-09	737
DOE	Twitter	http://twitter.com/nyctf	2012-06-13	786
DOE	Twitter	http://twitter.com/nyctf	2012-07-05	807
DOE	Twitter	http://twitter.com/nyctf	2012-08-02	835
DOE	Twitter	http://twitter.com/nyctf	2012-09-21	914
DOE	Twitter	http://twitter.com/nyctf	2012-10-24	976
DOE	Twitter	http://twitter.com/nyctf	2012-11-02	1011
DOE	Twitter	http://twitter.com/nyctf	2012-11-09	1026
DOE	Twitter	http://twitter.com/TheFundforPS	2011-08-08	212
DOE	Twitter	http://twitter.com/TheFundforPS	2011-09-22	239
DOE	Twitter	http://twitter.com/TheFundforPS	2011-10-04
DOE	Twitter	http://twitter.com/TheFundforPS	2011-10-27	265
DOE	Twitter	http://twitter.com/TheFundforPS	2011-11-17	284
DOE	Twitter	http://twitter.com/TheFundforPS	2012-12-12	288
DOE	Twitter	http://twitter.com/TheFundforPS	2011-12-30	297
DOE	Twitter	http://twitter.com/TheFundforPS	2012-01-20	315
DOE	Twitter	http://twitter.com/TheFundforPS	2012-02-17	330
DOE	Twitter	http://twitter.com/TheFundforPS	2012-03-14	350
DOE	Twitter	http://twitter.com/TheFundforPS	2012-04-09	367
DOE	Twitter	http://twitter.com/TheFundforPS	2012-04-30	375
DOE	Twitter	http://twitter.com/TheFundforPS	2012-05-09	379
DOE	Twitter	http://twitter.com/TheFundforPS	2012-06-13	412
DOE	Twitter	http://twitter.com/TheFundforPS	2012-07-05
DOE	Twitter	http://twitter.com/TheFundforPS	2012-08-02	454
DOE	Twitter	http://twitter.com/TheFundforPS	2012-09-21	592
DOE	Twitter	http://twitter.com/TheFundforPS	2012-10-24	674
DOE	Twitter	http://twitter.com/TheFundforPS	2012-11-02	693
DOE	Twitter	http://twitter.com/TheFundforPS	2012-11-09	701
DOE	Facebook	http://www.facebook.com/fundforpublicschools	2011-08-08	8075
DOE	Facebook	http://www.facebook.com/fundforpublicschools	2011-09-22	8125
DOE	Facebook	http://www.facebook.com/fundforpublicschools	2011-10-04	8142
DOE	Facebook	http://www.facebook.com/fundforpublicschools	2011-10-27	8160
DOE	Facebook	http://www.facebook.com/fundforpublicschools	2011-11-17	8206
DOE	Facebook	http://www.facebook.com/fundforpublicschools	2012-12-12	8223
DOE	Facebook	http://www.facebook.com/fundforpublicschools	2011-12-30	8223
DOE	Facebook	http://www.facebook.com/fundforpublicschools	2012-01-20	8237
DOE	Facebook	http://www.facebook.com/fundforpublicschools	2012-02-17	8261
DOE	Facebook	http://www.facebook.com/fundforpublicschools	2012-03-14	8291
DOE	Facebook	http://www.facebook.com/fundforpublicschools	2012-04-09	8316
DOE	Facebook	http://www.facebook.com/fundforpublicschools	2012-04-30	8326
DOE	Facebook	http://www.facebook.com/fundforpublicschools	2012-05-09	8327
DOE	Facebook	http://www.facebook.com/fundforpublicschools	2012-06-13	8337
DOE	Facebook	http://www.facebook.com/fundforpublicschools	2012-07-05	8345
DOE	Facebook	http://www.facebook.com/fundforpublicschools	2012-08-02	8357
DOE	Facebook	http://www.facebook.com/fundforpublicschools	2012-09-21	8372
DOE	Facebook	http://www.facebook.com/fundforpublicschools	2012-10-24	8374
DOE	Facebook	http://www.facebook.com/fundforpublicschools	2012-11-02	8381
DOE	Facebook	http://www.facebook.com/fundforpublicschools	2012-11-09	8392
DOE	Facebook	http://www.facebook.com/nycgrads	2011-08-08	1825
DOE	Facebook	http://www.facebook.com/nycgrads	2011-09-22	1832
DOE	Facebook	http://www.facebook.com/nycgrads	2011-10-04	1831
DOE	Facebook	http://www.facebook.com/nycgrads	2011-10-27	1837
DOE	Facebook	http://www.facebook.com/nycgrads	2011-11-17	1840
DOE	Facebook	http://www.facebook.com/nycgrads	2012-12-12	1839
DOE	Facebook	http://www.facebook.com/nycgrads	2011-12-30	1839
DOE	Facebook	http://www.facebook.com/nycgrads	2012-01-20	1837
DOE	Facebook	http://www.facebook.com/nycgrads	2012-02-17
DOE	Facebook	http://www.facebook.com/nycgrads	2012-03-14	1832
DOE	Facebook	http://www.facebook.com/nycgrads	2012-04-09	1830
DOE	Facebook	http://www.facebook.com/nycgrads	2012-04-30	1831
DOE	Facebook	http://www.facebook.com/nycgrads	2012-05-09	1828
DOE	Facebook	http://www.facebook.com/nycgrads	2012-06-13	1822
DOE	Facebook	http://www.facebook.com/nycgrads	2012-07-05	1820
DOE	Facebook	http://www.facebook.com/nycgrads	2012-08-02	1820
DOE	Facebook	http://www.facebook.com/nycgrads	2012-09-21	1812
DOE	Facebook	http://www.facebook.com/nycgrads	2012-10-24	1806
DOE	Facebook	http://www.facebook.com/nycgrads	2012-11-02	1807
DOE	Facebook	http://www.facebook.com/nycgrads	2012-11-09	1809
NYC Schools	Facebook	http://www.facebook.com/NYCschools	2011-08-08	15559
NYC Schools	Facebook	http://www.facebook.com/NYCschools	2011-09-22	16667
NYC Schools	Facebook	http://www.facebook.com/NYCschools	2011-10-04	16929
NYC Schools	Facebook	http://www.facebook.com/NYCschools	2011-10-27	17385
NYC Schools	Facebook	http://www.facebook.com/NYCschools	2011-11-17	17742
NYC Schools	Facebook	http://www.facebook.com/NYCschools	2012-12-12	18067
NYC Schools	Facebook	http://www.facebook.com/NYCschools	2011-12-30	18290
NYC Schools	Facebook	http://www.facebook.com/NYCschools	2012-01-20	18679
NYC Schools	Facebook	http://www.facebook.com/NYCschools	2012-02-17
NYC Schools	Facebook	http://www.facebook.com/NYCschools	2012-03-14	19689
NYC Schools	Facebook	http://www.facebook.com/NYCschools	2012-04-09	20101
NYC Schools	Facebook	http://www.facebook.com/NYCschools	2012-04-30	20447
NYC Schools	Facebook	http://www.facebook.com/NYCschools	2012-05-09	20583
NYC Schools	Facebook	http://www.facebook.com/NYCschools	2012-06-13	21228
NYC Schools	Facebook	http://www.facebook.com/NYCschools	2012-07-05	21690
NYC Schools	Facebook	http://www.facebook.com/NYCschools	2012-08-02	22141
NYC Schools	Facebook	http://www.facebook.com/NYCschools	2012-09-21	23311
NYC Schools	Facebook	http://www.facebook.com/NYCschools	2012-10-24	23968
NYC Schools	Facebook	http://www.facebook.com/NYCschools	2012-11-02	26103
NYC Schools	Facebook	http://www.facebook.com/NYCschools	2012-11-09	26727
NYC TeachingFellows	Facebook	http://www.facebook.com/NYCTeachingFellows	2011-08-08	4451
NYC TeachingFellows	Facebook	http://www.facebook.com/NYCTeachingFellows	2011-09-22	4573
NYC TeachingFellows	Facebook	http://www.facebook.com/NYCTeachingFellows	2011-10-04	4581
NYC TeachingFellows	Facebook	http://www.facebook.com/NYCTeachingFellows	2011-10-27	4641
NYC TeachingFellows	Facebook	http://www.facebook.com/NYCTeachingFellows	2011-11-17	4727
NYC TeachingFellows	Facebook	http://www.facebook.com/NYCTeachingFellows	2012-12-12	4810
NYC TeachingFellows	Facebook	http://www.facebook.com/NYCTeachingFellows	2011-12-30	4842
NYC TeachingFellows	Facebook	http://www.facebook.com/NYCTeachingFellows	2012-01-20	4971
NYC TeachingFellows	Facebook	http://www.facebook.com/NYCTeachingFellows	2012-02-17	5015
NYC TeachingFellows	Facebook	http://www.facebook.com/NYCTeachingFellows	2012-03-14	5148
NYC TeachingFellows	Facebook	http://www.facebook.com/NYCTeachingFellows	2012-04-09	5277
NYC TeachingFellows	Facebook	http://www.facebook.com/NYCTeachingFellows	2012-04-30	5354
NYC TeachingFellows	Facebook	http://www.facebook.com/NYCTeachingFellows	2012-05-09	5382
NYC TeachingFellows	Facebook	http://www.facebook.com/NYCTeachingFellows	2012-06-13	5491
NYC TeachingFellows	Facebook	http://www.facebook.com/NYCTeachingFellows	2012-07-05	5582
NYC TeachingFellows	Facebook	http://www.facebook.com/NYCTeachingFellows	2012-08-02	5634
NYC TeachingFellows	Facebook	http://www.facebook.com/NYCTeachingFellows	2012-09-21	5742
NYC TeachingFellows	Facebook	http://www.facebook.com/NYCTeachingFellows	2012-10-24	5835
NYC TeachingFellows	Facebook	http://www.facebook.com/NYCTeachingFellows	2012-11-02	5860
NYC TeachingFellows	Facebook	http://www.facebook.com/NYCTeachingFellows	2012-11-09	5878
I teach NYC	Facebook	http://www.facebook.com/pages/I-TEACH-NYC/11409913191	2011-08-08	7130
I teach NYC	Facebook	http://www.facebook.com/pages/I-TEACH-NYC/11409913191	2011-09-22	7283
I teach NYC	Facebook	http://www.facebook.com/pages/I-TEACH-NYC/11409913191	2011-10-04	7301
I teach NYC	Facebook	http://www.facebook.com/pages/I-TEACH-NYC/11409913191	2011-10-27	7348
I teach NYC	Facebook	http://www.facebook.com/pages/I-TEACH-NYC/11409913191	2011-11-17	7389
I teach NYC	Facebook	http://www.facebook.com/pages/I-TEACH-NYC/11409913191	2012-12-12	7420
I teach NYC	Facebook	http://www.facebook.com/pages/I-TEACH-NYC/11409913191	2011-12-30	7456
I teach NYC	Facebook	http://www.facebook.com/pages/I-TEACH-NYC/11409913191	2012-01-20	7481
I teach NYC	Facebook	http://www.facebook.com/pages/I-TEACH-NYC/11409913191	2012-02-17	7530
I teach NYC	Facebook	http://www.facebook.com/pages/I-TEACH-NYC/11409913191	2012-03-14	7584
I teach NYC	Facebook	http://www.facebook.com/pages/I-TEACH-NYC/11409913191	2012-04-09	7662
I teach NYC	Facebook	http://www.facebook.com/pages/I-TEACH-NYC/11409913191	2012-04-30	7708
I teach NYC	Facebook	http://www.facebook.com/pages/I-TEACH-NYC/11409913191	2012-05-09	7726
I teach NYC	Facebook	http://www.facebook.com/pages/I-TEACH-NYC/11409913191	2012-06-13	7789
I teach NYC	Facebook	http://www.facebook.com/pages/I-TEACH-NYC/11409913191	2012-07-05	7818
I teach NYC	Facebook	http://www.facebook.com/pages/I-TEACH-NYC/11409913191	2012-08-02	7872
I teach NYC	Facebook	http://www.facebook.com/pages/I-TEACH-NYC/11409913191	2012-09-21	7962
I teach NYC	Facebook	http://www.facebook.com/pages/I-TEACH-NYC/11409913191	2012-10-24	8000
I teach NYC	Facebook	http://www.facebook.com/pages/I-TEACH-NYC/11409913191	2012-11-02	8028
I teach NYC	Facebook	http://www.facebook.com/pages/I-TEACH-NYC/11409913191	2012-11-09	8041
NYC Schools	Flickr	http://www.flickr.com/photos/nycschools	2011-08-08
NYC Schools	Flickr	http://www.flickr.com/photos/nycschools	2011-09-22
NYC Schools	Flickr	http://www.flickr.com/photos/nycschools	2011-10-04
NYC Schools	Flickr	http://www.flickr.com/photos/nycschools	2011-10-27
NYC Schools	Flickr	http://www.flickr.com/photos/nycschools	2011-11-17
NYC Schools	Flickr	http://www.flickr.com/photos/nycschools	2012-12-12
NYC Schools	Flickr	http://www.flickr.com/photos/nycschools	2011-12-30
NYC Schools	Flickr	http://www.flickr.com/photos/nycschools	2012-01-20
NYC Schools	Flickr	http://www.flickr.com/photos/nycschools	2012-02-17
NYC Schools	Flickr	http://www.flickr.com/photos/nycschools	2012-03-14
NYC Schools	Flickr	http://www.flickr.com/photos/nycschools	2012-04-09
NYC Schools	Flickr	http://www.flickr.com/photos/nycschools	2012-04-30
NYC Schools	Flickr	http://www.flickr.com/photos/nycschools	2012-05-09
NYC Schools	Flickr	http://www.flickr.com/photos/nycschools	2012-06-13
NYC Schools	Flickr	http://www.flickr.com/photos/nycschools	2012-07-05
NYC Schools	Flickr	http://www.flickr.com/photos/nycschools	2012-08-02
NYC Schools	Flickr	http://www.flickr.com/photos/nycschools	2012-09-21
NYC Schools	Flickr	http://www.flickr.com/photos/nycschools	2012-10-24
NYC Schools	Flickr	http://www.flickr.com/photos/nycschools	2012-11-02
NYC Schools	Flickr	http://www.flickr.com/photos/nycschools	2012-11-09
DOE (not available)	YouTube	http://www.youtube.com/thefundforps	2011-08-08	1
DOE (not available)	YouTube	http://www.youtube.com/thefundforps	2011-09-22	1
DOE (not available)	YouTube	http://www.youtube.com/thefundforps	2011-10-04	1
DOE (not available)	YouTube	http://www.youtube.com/thefundforps	2011-10-27
DOE (not available)	YouTube	http://www.youtube.com/thefundforps	2011-11-17	1
DOE (not available)	YouTube	http://www.youtube.com/thefundforps	2012-12-12	1
DOE (not available)	YouTube	http://www.youtube.com/thefundforps	2011-12-30	1
DOE (not available)	YouTube	http://www.youtube.com/thefundforps	2012-01-20	1
DOE (not available)	YouTube	http://www.youtube.com/thefundforps	2012-02-17	1
DOE (not available)	YouTube	http://www.youtube.com/thefundforps	2012-03-14	1
DOE (not available)	YouTube	http://www.youtube.com/thefundforps	2012-04-09	1
DOE (not available)	YouTube	http://www.youtube.com/thefundforps	2012-04-30	1
DOE (not available)	YouTube	http://www.youtube.com/thefundforps	2012-05-09
DOE (not available)	YouTube	http://www.youtube.com/thefundforps	2012-06-13	1
DOE (not available)	YouTube	http://www.youtube.com/thefundforps	2012-07-05	1
DOE (not available)	YouTube	http://www.youtube.com/thefundforps	2012-08-02	1
DOE (not available)	YouTube	http://www.youtube.com/thefundforps	2012-09-21
DOE (not available)	YouTube	http://www.youtube.com/thefundforps	2012-10-24
DOE (not available)	YouTube	http://www.youtube.com/thefundforps	2012-11-02
DOE (not available)	YouTube	http://www.youtube.com/thefundforps	2012-11-09
DOE	Newsletter		2011-08-08	187180
DOE	Newsletter		2011-11-17	187180
DOE	Newsletter		2011-09-22	187180
DOE	Newsletter		2011-10-04
DOE	Newsletter		2011-10-27
DOE	Newsletter		2012-12-12	187180
DOE	Newsletter		2011-12-30	187180
DOE	Newsletter		2012-01-20	187180
DOE	Newsletter		2012-02-17	187180
DOE	Newsletter		2012-03-14	187180
DOE	Newsletter		2012-04-09	187180
DOE	Newsletter		2012-04-30	187180
DOE	Newsletter		2012-05-09	187180
DOE	Newsletter		2012-06-13	370351
DOE	Newsletter		2012-07-05	370351
DOE	Newsletter		2012-08-02	370351
DOE	Newsletter		2012-09-21	370351
DOE	Newsletter		2012-10-24	370351
DOE	Newsletter		2012-11-02	370351
DOE	Newsletter		2012-11-09	370351
DOE (not available)	Linked-In	http://www.linkedin.com/groups?gid=1545057&home=	2011-08-08	92
DOE (not available)	Linked-In	http://www.linkedin.com/groups?gid=1545057&home=	2011-09-22	208
DOE (not available)	Linked-In	http://www.linkedin.com/groups?gid=1545057&home=	2011-10-04	208
DOE (not available)	Linked-In	http://www.linkedin.com/groups?gid=1545057&home=	2011-10-27	208
DOE (not available)	Linked-In	http://www.linkedin.com/groups?gid=1545057&home=	2011-11-17	206
DOE (not available)	Linked-In	http://www.linkedin.com/groups?gid=1545057&home=	2012-12-12	206
DOE (not available)	Linked-In	http://www.linkedin.com/groups?gid=1545057&home=	2011-12-30	205
DOE (not available)	Linked-In	http://www.linkedin.com/groups?gid=1545057&home=	2012-01-20	205
DOE (not available)	Linked-In	http://www.linkedin.com/groups?gid=1545057&home=	2012-02-17	289
DOE (not available)	Linked-In	http://www.linkedin.com/groups?gid=1545057&home=	2012-03-14	288
DOE (not available)	Linked-In	http://www.linkedin.com/groups?gid=1545057&home=	2012-04-09	287
DOE (not available)	Linked-In	http://www.linkedin.com/groups?gid=1545057&home=	2012-04-30	284
DOE (not available)	Linked-In	http://www.linkedin.com/groups?gid=1545057&home=	2012-05-09	283
DOE (not available)	Linked-In	http://www.linkedin.com/groups?gid=1545057&home=	2012-06-13	282
DOE (not available)	Linked-In	http://www.linkedin.com/groups?gid=1545057&home=	2012-07-05	279
DOE (not available)	Linked-In	http://www.linkedin.com/groups?gid=1545057&home=	2012-08-02	277
DOE (not available)	Linked-In	http://www.linkedin.com/groups?gid=1545057&home=	2012-09-21	531
DOE (not available)	Linked-In	http://www.linkedin.com/groups?gid=1545057&home=	2012-10-24	526
DOE (not available)	Linked-In	http://www.linkedin.com/groups?gid=1545057&home=	2012-11-02	526
DOE (not available)	Linked-In	http://www.linkedin.com/groups?gid=1545057&home=	2012-11-09	526
DOF	Linked-In	http://www.linkedin.com/company/298308?trk=tyah	2011-08-08
DOF	Linked-In	http://www.linkedin.com/company/298308?trk=tyah	2011-09-22
DOF	Linked-In	http://www.linkedin.com/company/298308?trk=tyah	2011-10-04
DOF	Linked-In	http://www.linkedin.com/company/298308?trk=tyah	2011-10-27
DOF	Linked-In	http://www.linkedin.com/company/298308?trk=tyah	2011-11-17
DOF	Linked-In	http://www.linkedin.com/company/298308?trk=tyah	2012-12-12
DOF	Linked-In	http://www.linkedin.com/company/298308?trk=tyah	2011-12-30
DOF	Linked-In	http://www.linkedin.com/company/298308?trk=tyah	2012-01-20
DOF	Linked-In	http://www.linkedin.com/company/298308?trk=tyah	2012-02-17
DOF	Linked-In	http://www.linkedin.com/company/298308?trk=tyah	2012-03-14
DOF	Linked-In	http://www.linkedin.com/company/298308?trk=tyah	2012-04-09
DOF	Linked-In	http://www.linkedin.com/company/298308?trk=tyah	2012-04-30
DOF	Linked-In	http://www.linkedin.com/company/298308?trk=tyah	2012-05-09	144
DOF	Linked-In	http://www.linkedin.com/company/298308?trk=tyah	2012-06-13	151
DOF	Linked-In	http://www.linkedin.com/company/298308?trk=tyah	2012-07-05	155
DOF	Linked-In	http://www.linkedin.com/company/298308?trk=tyah	2012-08-02	156
DOF	Linked-In	http://www.linkedin.com/company/298308?trk=tyah	2012-09-21	163
DOF	Linked-In	http://www.linkedin.com/company/298308?trk=tyah	2012-10-24	152
DOF	Linked-In	http://www.linkedin.com/company/298308?trk=tyah	2012-11-02	151
DOF	Linked-In	http://www.linkedin.com/company/298308?trk=tyah	2012-11-09	151
DOF	Twitter	https://twitter.com/nycfinance	2011-08-08
DOF	Twitter	https://twitter.com/nycfinance	2011-09-22
DOF	Twitter	https://twitter.com/nycfinance	2011-10-04
DOF	Twitter	https://twitter.com/nycfinance	2011-10-27
DOF	Twitter	https://twitter.com/nycfinance	2011-11-17
DOF	Twitter	https://twitter.com/nycfinance	2012-12-12
DOF	Twitter	https://twitter.com/nycfinance	2011-12-30
DOF	Twitter	https://twitter.com/nycfinance	2012-01-20
DOF	Twitter	https://twitter.com/nycfinance	2012-02-17
DOF	Twitter	https://twitter.com/nycfinance	2012-03-14
DOF	Twitter	https://twitter.com/nycfinance	2012-04-09
DOF	Twitter	https://twitter.com/nycfinance	2012-04-30
DOF	Twitter	https://twitter.com/nycfinance	2012-05-09	776
DOF	Twitter	https://twitter.com/nycfinance	2012-06-13	846
DOF	Twitter	https://twitter.com/nycfinance	2012-07-05	883
DOF	Twitter	https://twitter.com/nycfinance	2012-08-02	945
DOF	Twitter	https://twitter.com/nycfinance	2012-09-21	1064
DOF	Twitter	https://twitter.com/nycfinance	2012-10-24	1119
DOF	Twitter	https://twitter.com/nycfinance	2012-11-02	1190
DOF	Twitter	https://twitter.com/nycfinance	2012-11-09	1245
Condom Finder	Android	Condom Finder	2011-08-08	5026
Condom Finder	Android	Condom Finder	2011-09-22
Condom Finder	Android	Condom Finder	2011-10-04
Condom Finder	Android	Condom Finder	2011-10-27
Condom Finder	Android	Condom Finder	2011-11-17
Condom Finder	Android	Condom Finder	2012-12-12
Condom Finder	Android	Condom Finder	2011-12-30
Condom Finder	Android	Condom Finder	2012-01-20
Condom Finder	Android	Condom Finder	2012-02-17
Condom Finder	Android	Condom Finder	2012-03-14
Condom Finder	Android	Condom Finder	2012-04-09
Condom Finder	Android	Condom Finder	2012-04-30
Condom Finder	Android	Condom Finder	2012-05-09
Condom Finder	Android	Condom Finder	2012-06-13
Condom Finder	Android	Condom Finder	2012-07-05
Condom Finder	Android	Condom Finder	2012-08-02
Condom Finder	Android	Condom Finder	2012-09-21
Condom Finder	Android	Condom Finder	2012-10-24	5028
Condom Finder	Android	Condom Finder	2012-11-02	5028
Condom Finder	Android	Condom Finder	2012-11-09	5028
Condom Finder	iPhone app	http://itunes.apple.com/app/nyc-condom-finder-by-nyc-health/id418902795	2011-08-08	8041
Condom Finder	iPhone app	http://itunes.apple.com/app/nyc-condom-finder-by-nyc-health/id418902795	2011-09-22
Condom Finder	iPhone app	http://itunes.apple.com/app/nyc-condom-finder-by-nyc-health/id418902795	2011-10-04
Condom Finder	iPhone app	http://itunes.apple.com/app/nyc-condom-finder-by-nyc-health/id418902795	2011-10-27
Condom Finder	iPhone app	http://itunes.apple.com/app/nyc-condom-finder-by-nyc-health/id418902795	2011-11-17	8041
Condom Finder	iPhone app	http://itunes.apple.com/app/nyc-condom-finder-by-nyc-health/id418902795	2012-12-12	8041
Condom Finder	iPhone app	http://itunes.apple.com/app/nyc-condom-finder-by-nyc-health/id418902795	2011-12-30	8041
Condom Finder	iPhone app	http://itunes.apple.com/app/nyc-condom-finder-by-nyc-health/id418902795	2012-01-20	8041
Condom Finder	iPhone app	http://itunes.apple.com/app/nyc-condom-finder-by-nyc-health/id418902795	2012-02-17	8041
Condom Finder	iPhone app	http://itunes.apple.com/app/nyc-condom-finder-by-nyc-health/id418902795	2012-03-14	8041
Condom Finder	iPhone app	http://itunes.apple.com/app/nyc-condom-finder-by-nyc-health/id418902795	2012-04-09	8041
Condom Finder	iPhone app	http://itunes.apple.com/app/nyc-condom-finder-by-nyc-health/id418902795	2012-04-30	28000
Condom Finder	iPhone app	http://itunes.apple.com/app/nyc-condom-finder-by-nyc-health/id418902795	2012-05-09	28000
Condom Finder	iPhone app	http://itunes.apple.com/app/nyc-condom-finder-by-nyc-health/id418902795	2012-06-13
Condom Finder	iPhone app	http://itunes.apple.com/app/nyc-condom-finder-by-nyc-health/id418902795	2012-07-05	28000
Condom Finder	iPhone app	http://itunes.apple.com/app/nyc-condom-finder-by-nyc-health/id418902795	2012-08-02	28000
Condom Finder	iPhone app	http://itunes.apple.com/app/nyc-condom-finder-by-nyc-health/id418902795	2012-09-21	28000
Condom Finder	iPhone app	http://itunes.apple.com/app/nyc-condom-finder-by-nyc-health/id418902795	2012-10-24	28000
Condom Finder	iPhone app	http://itunes.apple.com/app/nyc-condom-finder-by-nyc-health/id418902795	2012-11-02	28000
Condom Finder	iPhone app	http://itunes.apple.com/app/nyc-condom-finder-by-nyc-health/id418902795	2012-11-09	28000
ABCEats	iPhone	http://itunes.apple.com/us/app/abceats/id502867547?mt=8	2011-08-08
ABCEats	iPhone	http://itunes.apple.com/us/app/abceats/id502867547?mt=8	2011-09-22
ABCEats	iPhone	http://itunes.apple.com/us/app/abceats/id502867547?mt=8	2011-10-04
ABCEats	iPhone	http://itunes.apple.com/us/app/abceats/id502867547?mt=8	2011-10-27
ABCEats	iPhone	http://itunes.apple.com/us/app/abceats/id502867547?mt=8	2011-11-17
ABCEats	iPhone	http://itunes.apple.com/us/app/abceats/id502867547?mt=8	2012-12-12
ABCEats	iPhone	http://itunes.apple.com/us/app/abceats/id502867547?mt=8	2011-12-30
ABCEats	iPhone	http://itunes.apple.com/us/app/abceats/id502867547?mt=8	2012-01-20
ABCEats	iPhone	http://itunes.apple.com/us/app/abceats/id502867547?mt=8	2012-02-17
ABCEats	iPhone	http://itunes.apple.com/us/app/abceats/id502867547?mt=8	2012-03-14
ABCEats	iPhone	http://itunes.apple.com/us/app/abceats/id502867547?mt=8	2012-04-09
ABCEats	iPhone	http://itunes.apple.com/us/app/abceats/id502867547?mt=8	2012-04-30	8203
ABCEats	iPhone	http://itunes.apple.com/us/app/abceats/id502867547?mt=8	2012-05-09	8203
ABCEats	iPhone	http://itunes.apple.com/us/app/abceats/id502867547?mt=8	2012-06-13	9643
ABCEats	iPhone	http://itunes.apple.com/us/app/abceats/id502867547?mt=8	2012-07-05	10336
ABCEats	iPhone	http://itunes.apple.com/us/app/abceats/id502867547?mt=8	2012-08-02	10336
ABCEats	iPhone	http://itunes.apple.com/us/app/abceats/id502867547?mt=8	2012-09-21	12924
ABCEats	iPhone	http://itunes.apple.com/us/app/abceats/id502867547?mt=8	2012-10-24	12924
ABCEats	iPhone	http://itunes.apple.com/us/app/abceats/id502867547?mt=8	2012-11-02	12924
ABCEats	iPhone	http://itunes.apple.com/us/app/abceats/id502867547?mt=8	2012-11-09	12924
DOH	Tumblr	http://mygooddognyc.tumblr.com/	2011-08-08
DOH	Tumblr	http://mygooddognyc.tumblr.com/	2011-09-22
DOH	Tumblr	http://mygooddognyc.tumblr.com/	2011-10-04
DOH	Tumblr	http://mygooddognyc.tumblr.com/	2011-10-27
DOH	Tumblr	http://mygooddognyc.tumblr.com/	2011-11-17
DOH	Tumblr	http://mygooddognyc.tumblr.com/	2012-12-12
DOH	Tumblr	http://mygooddognyc.tumblr.com/	2011-12-30
DOH	Tumblr	http://mygooddognyc.tumblr.com/	2012-01-20
DOH	Tumblr	http://mygooddognyc.tumblr.com/	2012-02-17
DOH	Tumblr	http://mygooddognyc.tumblr.com/	2012-03-14
DOH	Tumblr	http://mygooddognyc.tumblr.com/	2012-04-09
DOH	Tumblr	http://mygooddognyc.tumblr.com/	2012-04-30
DOH	Tumblr	http://mygooddognyc.tumblr.com/	2012-05-09
DOH	Tumblr	http://mygooddognyc.tumblr.com/	2012-06-13
DOH	Tumblr	http://mygooddognyc.tumblr.com/	2012-07-05
DOH	Tumblr	http://mygooddognyc.tumblr.com/	2012-08-02
DOH	Tumblr	http://mygooddognyc.tumblr.com/	2012-09-21	18
DOH	Tumblr	http://mygooddognyc.tumblr.com/	2012-10-24	27
DOH	Tumblr	http://mygooddognyc.tumblr.com/	2012-11-02	28
DOH	Tumblr	http://mygooddognyc.tumblr.com/	2012-11-09	28
NYC Health	Tumblr	http://nychealth.tumblr.com/	2011-08-08
NYC Health	Tumblr	http://nychealth.tumblr.com/	2011-09-22
NYC Health	Tumblr	http://nychealth.tumblr.com/	2011-10-04
NYC Health	Tumblr	http://nychealth.tumblr.com/	2011-10-27
NYC Health	Tumblr	http://nychealth.tumblr.com/	2011-11-17
NYC Health	Tumblr	http://nychealth.tumblr.com/	2012-12-12
NYC Health	Tumblr	http://nychealth.tumblr.com/	2011-12-30
NYC Health	Tumblr	http://nychealth.tumblr.com/	2012-01-20
NYC Health	Tumblr	http://nychealth.tumblr.com/	2012-02-17
NYC Health	Tumblr	http://nychealth.tumblr.com/	2012-03-14
NYC Health	Tumblr	http://nychealth.tumblr.com/	2012-04-09
NYC Health	Tumblr	http://nychealth.tumblr.com/	2012-04-30
NYC Health	Tumblr	http://nychealth.tumblr.com/	2012-05-09
NYC Health	Tumblr	http://nychealth.tumblr.com/	2012-06-13	54
NYC Health	Tumblr	http://nychealth.tumblr.com/	2012-07-05	54
NYC Health	Tumblr	http://nychealth.tumblr.com/	2012-08-02	54
NYC Health	Tumblr	http://nychealth.tumblr.com/	2012-09-21	54
NYC Health	Tumblr	http://nychealth.tumblr.com/	2012-10-24	54
NYC Health	Tumblr	http://nychealth.tumblr.com/	2012-11-02	54
NYC Health	Tumblr	http://nychealth.tumblr.com/	2012-11-09	54
NYC Health	Pinterest	http://pinterest.com/nychealth	2011-08-08
NYC Health	Pinterest	http://pinterest.com/nychealth	2011-09-22
NYC Health	Pinterest	http://pinterest.com/nychealth	2011-10-04
NYC Health	Pinterest	http://pinterest.com/nychealth	2011-10-27
NYC Health	Pinterest	http://pinterest.com/nychealth	2011-11-17
NYC Health	Pinterest	http://pinterest.com/nychealth	2012-12-12
NYC Health	Pinterest	http://pinterest.com/nychealth	2011-12-30
NYC Health	Pinterest	http://pinterest.com/nychealth	2012-01-20
NYC Health	Pinterest	http://pinterest.com/nychealth	2012-02-17
NYC Health	Pinterest	http://pinterest.com/nychealth	2012-03-14
NYC Health	Pinterest	http://pinterest.com/nychealth	2012-04-09
NYC Health	Pinterest	http://pinterest.com/nychealth	2012-04-30
NYC Health	Pinterest	http://pinterest.com/nychealth	2012-05-09
NYC Health	Pinterest	http://pinterest.com/nychealth	2012-06-13
NYC Health	Pinterest	http://pinterest.com/nychealth	2012-07-05
NYC Health	Pinterest	http://pinterest.com/nychealth	2012-08-02	2
NYC Health	Pinterest	http://pinterest.com/nychealth	2012-09-21	9
NYC Health	Pinterest	http://pinterest.com/nychealth	2012-10-24	9
NYC Health	Pinterest	http://pinterest.com/nychealth	2012-11-02	9
NYC Health	Pinterest	http://pinterest.com/nychealth	2012-11-09	9
NYC Health	Twitter	http://twitter.com/nycHealthy	2011-08-08	4371
NYC Health	Twitter	http://twitter.com/nycHealthy	2011-09-22	5168
NYC Health	Twitter	http://twitter.com/nycHealthy	2011-10-04
NYC Health	Twitter	http://twitter.com/nycHealthy	2011-10-27	5698
NYC Health	Twitter	http://twitter.com/nycHealthy	2011-11-17	6083
NYC Health	Twitter	http://twitter.com/nycHealthy	2012-12-12	6452
NYC Health	Twitter	http://twitter.com/nycHealthy	2011-12-30	6643
NYC Health	Twitter	http://twitter.com/nycHealthy	2012-01-20	6995
NYC Health	Twitter	http://twitter.com/nycHealthy	2012-02-17	7541
NYC Health	Twitter	http://twitter.com/nycHealthy	2012-03-14	7925
NYC Health	Twitter	http://twitter.com/nycHealthy	2012-04-09	8313
NYC Health	Twitter	http://twitter.com/nycHealthy	2012-04-30	8661
NYC Health	Twitter	http://twitter.com/nycHealthy	2012-05-09	1785
NYC Health	Twitter	http://twitter.com/nycHealthy	2012-06-13	9385
NYC Health	Twitter	http://twitter.com/nycHealthy	2012-07-05	9800
NYC Health	Twitter	http://twitter.com/nycHealthy	2012-08-02	10214
NYC Health	Twitter	http://twitter.com/nycHealthy	2012-09-21	10957
NYC Health	Twitter	http://twitter.com/nycHealthy	2012-10-24	11459
NYC Health	Twitter	http://twitter.com/nycHealthy	2012-11-02	11725
NYC Health	Twitter	http://twitter.com/nycHealthy	2012-11-09	11904
Eating Healthy NYC	Facebook	http://www.facebook.com/EatingHealthyNYC	2011-08-08	1782
Eating Healthy NYC	Facebook	http://www.facebook.com/EatingHealthyNYC	2011-09-22	4200
Eating Healthy NYC	Facebook	http://www.facebook.com/EatingHealthyNYC	2011-10-04	4236
Eating Healthy NYC	Facebook	http://www.facebook.com/EatingHealthyNYC	2011-10-27	4551
Eating Healthy NYC	Facebook	http://www.facebook.com/EatingHealthyNYC	2011-11-17	5927
Eating Healthy NYC	Facebook	http://www.facebook.com/EatingHealthyNYC	2012-12-12	6645
Eating Healthy NYC	Facebook	http://www.facebook.com/EatingHealthyNYC	2011-12-30	6695
Eating Healthy NYC	Facebook	http://www.facebook.com/EatingHealthyNYC	2012-01-20	6776
Eating Healthy NYC	Facebook	http://www.facebook.com/EatingHealthyNYC	2012-02-17
Eating Healthy NYC	Facebook	http://www.facebook.com/EatingHealthyNYC	2012-03-14	7379
Eating Healthy NYC	Facebook	http://www.facebook.com/EatingHealthyNYC	2012-04-09	24618
Eating Healthy NYC	Facebook	http://www.facebook.com/EatingHealthyNYC	2012-04-30	33861
Eating Healthy NYC	Facebook	http://www.facebook.com/EatingHealthyNYC	2012-05-09	34087
Eating Healthy NYC	Facebook	http://www.facebook.com/EatingHealthyNYC	2012-06-13	34771
Eating Healthy NYC	Facebook	http://www.facebook.com/EatingHealthyNYC	2012-07-05	37408
Eating Healthy NYC	Facebook	http://www.facebook.com/EatingHealthyNYC	2012-08-02	39816
Eating Healthy NYC	Facebook	http://www.facebook.com/EatingHealthyNYC	2012-09-21	47041
Eating Healthy NYC	Facebook	http://www.facebook.com/EatingHealthyNYC	2012-10-24	47409
Eating Healthy NYC	Facebook	http://www.facebook.com/EatingHealthyNYC	2012-11-02	47522
Eating Healthy NYC	Facebook	http://www.facebook.com/EatingHealthyNYC	2012-11-09	47599
Condom Finder	Facebook	http://www.facebook.com/NYCcondom	2011-08-08	17264
Condom Finder	Facebook	http://www.facebook.com/NYCcondom	2011-09-22	17408
Condom Finder	Facebook	http://www.facebook.com/NYCcondom	2011-10-04	17433
Condom Finder	Facebook	http://www.facebook.com/NYCcondom	2011-10-27	17512
Condom Finder	Facebook	http://www.facebook.com/NYCcondom	2011-11-17	17549
Condom Finder	Facebook	http://www.facebook.com/NYCcondom	2012-12-12	17593
Condom Finder	Facebook	http://www.facebook.com/NYCcondom	2011-12-30	17626
Condom Finder	Facebook	http://www.facebook.com/NYCcondom	2012-01-20	17650
Condom Finder	Facebook	http://www.facebook.com/NYCcondom	2012-02-17
Condom Finder	Facebook	http://www.facebook.com/NYCcondom	2012-03-14	18058
Condom Finder	Facebook	http://www.facebook.com/NYCcondom	2012-04-09	18517
Condom Finder	Facebook	http://www.facebook.com/NYCcondom	2012-04-30	18808
Condom Finder	Facebook	http://www.facebook.com/NYCcondom	2012-05-09	18804
Condom Finder	Facebook	http://www.facebook.com/NYCcondom	2012-06-13	18814
Condom Finder	Facebook	http://www.facebook.com/NYCcondom	2012-07-05	18837
Condom Finder	Facebook	http://www.facebook.com/NYCcondom	2012-08-02	18940
Condom Finder	Facebook	http://www.facebook.com/NYCcondom	2012-09-21	19039
Condom Finder	Facebook	http://www.facebook.com/NYCcondom	2012-10-24	19006
Condom Finder	Facebook	http://www.facebook.com/NYCcondom	2012-11-02	19027
Condom Finder	Facebook	http://www.facebook.com/NYCcondom	2012-11-09	19053
NYCKnows	Facebook	http://www.facebook.com/NYCKnows	2011-08-08	1466
NYCKnows	Facebook	http://www.facebook.com/NYCKnows	2011-09-22	1489
NYCKnows	Facebook	http://www.facebook.com/NYCKnows	2011-10-04	1507
NYCKnows	Facebook	http://www.facebook.com/NYCKnows	2011-10-27	1542
NYCKnows	Facebook	http://www.facebook.com/NYCKnows	2011-11-17	1560
NYCKnows	Facebook	http://www.facebook.com/NYCKnows	2012-12-12	1591
NYCKnows	Facebook	http://www.facebook.com/NYCKnows	2011-12-30	1593
NYCKnows	Facebook	http://www.facebook.com/NYCKnows	2012-01-20	1602
NYCKnows	Facebook	http://www.facebook.com/NYCKnows	2012-02-17
NYCKnows	Facebook	http://www.facebook.com/NYCKnows	2012-03-14	1682
NYCKnows	Facebook	http://www.facebook.com/NYCKnows	2012-04-09	1712
NYCKnows	Facebook	http://www.facebook.com/NYCKnows	2012-04-30	1731
NYCKnows	Facebook	http://www.facebook.com/NYCKnows	2012-05-09	1728
NYCKnows	Facebook	http://www.facebook.com/NYCKnows	2012-06-13	1760
NYCKnows	Facebook	http://www.facebook.com/NYCKnows	2012-07-05	1798
NYCKnows	Facebook	http://www.facebook.com/NYCKnows	2012-08-02	1822
NYCKnows	Facebook	http://www.facebook.com/NYCKnows	2012-09-21	1854
NYCKnows	Facebook	http://www.facebook.com/NYCKnows	2012-10-24
NYCKnows	Facebook	http://www.facebook.com/NYCKnows	2012-11-02
NYCKnows	Facebook	http://www.facebook.com/NYCKnows	2012-11-09
NYCQuites	Facebook	http://www.facebook.com/nycquits	2011-08-08	6365
NYCQuites	Facebook	http://www.facebook.com/nycquits	2011-09-22	6469
NYCQuites	Facebook	http://www.facebook.com/nycquits	2011-10-04	6493
NYCQuites	Facebook	http://www.facebook.com/nycquits	2011-10-27	6548
NYCQuites	Facebook	http://www.facebook.com/nycquits	2011-11-17	6576
NYCQuites	Facebook	http://www.facebook.com/nycquits	2012-12-12	6595
NYCQuites	Facebook	http://www.facebook.com/nycquits	2011-12-30	6601
NYCQuites	Facebook	http://www.facebook.com/nycquits	2012-01-20	6649
NYCQuites	Facebook	http://www.facebook.com/nycquits	2012-02-17
NYCQuites	Facebook	http://www.facebook.com/nycquits	2012-03-14	7943
NYCQuites	Facebook	http://www.facebook.com/nycquits	2012-04-09	8753
NYCQuites	Facebook	http://www.facebook.com/nycquits	2012-04-30	8798
NYCQuites	Facebook	http://www.facebook.com/nycquits	2012-05-09	8793
NYCQuites	Facebook	http://www.facebook.com/nycquits	2012-06-13	9687
NYCQuites	Facebook	http://www.facebook.com/nycquits	2012-07-05	9932
NYCQuites	Facebook	http://www.facebook.com/nycquits	2012-08-02	9962
NYCQuites	Facebook	http://www.facebook.com/nycquits	2012-09-21	9995
NYCQuites	Facebook	http://www.facebook.com/nycquits	2012-10-24	10010
NYCQuites	Facebook	http://www.facebook.com/nycquits	2012-11-02	10033
NYCQuites	Facebook	http://www.facebook.com/nycquits	2012-11-09	10039
Pouring on the Pounds	Youtube	http://www.youtube.com/user/drinkingsugar	2011-08-08
Pouring on the Pounds	Youtube	http://www.youtube.com/user/drinkingsugar	2011-09-22
Pouring on the Pounds	Youtube	http://www.youtube.com/user/drinkingsugar	2011-10-04	127
Pouring on the Pounds	Youtube	http://www.youtube.com/user/drinkingsugar	2011-10-27
Pouring on the Pounds	Youtube	http://www.youtube.com/user/drinkingsugar	2011-11-17	140
Pouring on the Pounds	Youtube	http://www.youtube.com/user/drinkingsugar	2012-12-12	143
Pouring on the Pounds	Youtube	http://www.youtube.com/user/drinkingsugar	2011-12-30	148
Pouring on the Pounds	Youtube	http://www.youtube.com/user/drinkingsugar	2012-01-20	150
Pouring on the Pounds	Youtube	http://www.youtube.com/user/drinkingsugar	2012-02-17	155
Pouring on the Pounds	Youtube	http://www.youtube.com/user/drinkingsugar	2012-03-14	163
Pouring on the Pounds	Youtube	http://www.youtube.com/user/drinkingsugar	2012-04-09	176
Pouring on the Pounds	Youtube	http://www.youtube.com/user/drinkingsugar	2012-04-30	191
Pouring on the Pounds	Youtube	http://www.youtube.com/user/drinkingsugar	2012-05-09
Pouring on the Pounds	Youtube	http://www.youtube.com/user/drinkingsugar	2012-06-13	203
Pouring on the Pounds	Youtube	http://www.youtube.com/user/drinkingsugar	2012-07-05	210
Pouring on the Pounds	Youtube	http://www.youtube.com/user/drinkingsugar	2012-08-02	218
Pouring on the Pounds	Youtube	http://www.youtube.com/user/drinkingsugar	2012-09-21	233
Pouring on the Pounds	Youtube	http://www.youtube.com/user/drinkingsugar	2012-10-24	243
Pouring on the Pounds	Youtube	http://www.youtube.com/user/drinkingsugar	2012-11-02	245
Pouring on the Pounds	Youtube	http://www.youtube.com/user/drinkingsugar	2012-11-09	245
NYC Health	Foursquare	https://foursquare.com/nychealthy	2011-08-08
NYC Health	Foursquare	https://foursquare.com/nychealthy	2011-09-22
NYC Health	Foursquare	https://foursquare.com/nychealthy	2011-10-04
NYC Health	Foursquare	https://foursquare.com/nychealthy	2011-10-27	23
NYC Health	Foursquare	https://foursquare.com/nychealthy	2011-11-17	37
NYC Health	Foursquare	https://foursquare.com/nychealthy	2012-12-12	44
NYC Health	Foursquare	https://foursquare.com/nychealthy	2011-12-30	44
NYC Health	Foursquare	https://foursquare.com/nychealthy	2012-01-20	44
NYC Health	Foursquare	https://foursquare.com/nychealthy	2012-02-17	84
NYC Health	Foursquare	https://foursquare.com/nychealthy	2012-03-14	84
NYC Health	Foursquare	https://foursquare.com/nychealthy	2012-04-09	84
NYC Health	Foursquare	https://foursquare.com/nychealthy	2012-04-30	83
NYC Health	Foursquare	https://foursquare.com/nychealthy	2012-05-09	83
NYC Health	Foursquare	https://foursquare.com/nychealthy	2012-06-13	156
NYC Health	Foursquare	https://foursquare.com/nychealthy	2012-07-05	156
NYC Health	Foursquare	https://foursquare.com/nychealthy	2012-08-02	0
NYC Health	Foursquare	https://foursquare.com/nychealthy	2012-09-21	287
NYC Health	Foursquare	https://foursquare.com/nychealthy	2012-10-24	361
NYC Health	Foursquare	https://foursquare.com/nychealthy	2012-11-02	370
NYC Health	Foursquare	https://foursquare.com/nychealthy	2012-11-09	370
DOHMH	Linked-In	http://www.linkedin.com/company/245926?trk=tyah	2011-08-08
DOHMH	Linked-In	http://www.linkedin.com/company/245926?trk=tyah	2011-09-22
DOHMH	Linked-In	http://www.linkedin.com/company/245926?trk=tyah	2011-10-04
DOHMH	Linked-In	http://www.linkedin.com/company/245926?trk=tyah	2011-10-27
DOHMH	Linked-In	http://www.linkedin.com/company/245926?trk=tyah	2011-11-17
DOHMH	Linked-In	http://www.linkedin.com/company/245926?trk=tyah	2012-12-12
DOHMH	Linked-In	http://www.linkedin.com/company/245926?trk=tyah	2011-12-30
DOHMH	Linked-In	http://www.linkedin.com/company/245926?trk=tyah	2012-01-20
DOHMH	Linked-In	http://www.linkedin.com/company/245926?trk=tyah	2012-02-17
DOHMH	Linked-In	http://www.linkedin.com/company/245926?trk=tyah	2012-03-14
DOHMH	Linked-In	http://www.linkedin.com/company/245926?trk=tyah	2012-04-09
DOHMH	Linked-In	http://www.linkedin.com/company/245926?trk=tyah	2012-04-30
DOHMH	Linked-In	http://www.linkedin.com/company/245926?trk=tyah	2012-05-09	1927
DOHMH	Linked-In	http://www.linkedin.com/company/245926?trk=tyah	2012-06-13	1874
DOHMH	Linked-In	http://www.linkedin.com/company/245926?trk=tyah	2012-07-05	2101
DOHMH	Linked-In	http://www.linkedin.com/company/245926?trk=tyah	2012-08-02	2181
DOHMH	Linked-In	http://www.linkedin.com/company/245926?trk=tyah	2012-09-21	2300
DOHMH	Linked-In	http://www.linkedin.com/company/245926?trk=tyah	2012-10-24	1432
DOHMH	Linked-In	http://www.linkedin.com/company/245926?trk=tyah	2012-11-02	1438
DOHMH	Linked-In	http://www.linkedin.com/company/245926?trk=tyah	2012-11-09	1438
DOHMH	Twitter	https://twitter.com/DrFarleyDOHMH	2011-08-08
DOHMH	Twitter	https://twitter.com/DrFarleyDOHMH	2011-09-22
DOHMH	Twitter	https://twitter.com/DrFarleyDOHMH	2011-10-04
DOHMH	Twitter	https://twitter.com/DrFarleyDOHMH	2011-10-27
DOHMH	Twitter	https://twitter.com/DrFarleyDOHMH	2011-11-17
DOHMH	Twitter	https://twitter.com/DrFarleyDOHMH	2012-12-12
DOHMH	Twitter	https://twitter.com/DrFarleyDOHMH	2011-12-30
DOHMH	Twitter	https://twitter.com/DrFarleyDOHMH	2012-01-20
DOHMH	Twitter	https://twitter.com/DrFarleyDOHMH	2012-02-17
DOHMH	Twitter	https://twitter.com/DrFarleyDOHMH	2012-03-14
DOHMH	Twitter	https://twitter.com/DrFarleyDOHMH	2012-04-09
DOHMH	Twitter	https://twitter.com/DrFarleyDOHMH	2012-04-30	147
DOHMH	Twitter	https://twitter.com/DrFarleyDOHMH	2012-05-09
DOHMH	Twitter	https://twitter.com/DrFarleyDOHMH	2012-06-13	327
DOHMH	Twitter	https://twitter.com/DrFarleyDOHMH	2012-07-05	388
DOHMH	Twitter	https://twitter.com/DrFarleyDOHMH	2012-08-02	476
DOHMH	Twitter	https://twitter.com/DrFarleyDOHMH	2012-09-21	663
DOHMH	Twitter	https://twitter.com/DrFarleyDOHMH	2012-10-24	733
DOHMH	Twitter	https://twitter.com/DrFarleyDOHMH	2012-11-02	764
DOHMH	Twitter	https://twitter.com/DrFarleyDOHMH	2012-11-09	797
DOI	Twitter	http://twitter.com/DOINews	2011-08-08	947
DOI	Twitter	http://twitter.com/DOINews	2011-09-22	1135
DOI	Twitter	http://twitter.com/DOINews	2011-10-04
DOI	Twitter	http://twitter.com/DOINews	2011-10-27	1264
DOI	Twitter	http://twitter.com/DOINews	2011-11-17	1332
DOI	Twitter	http://twitter.com/DOINews	2012-12-12	1382
DOI	Twitter	http://twitter.com/DOINews	2011-12-30	1418
DOI	Twitter	http://twitter.com/DOINews	2012-01-20	1477
DOI	Twitter	http://twitter.com/DOINews	2012-02-17	1551
DOI	Twitter	http://twitter.com/DOINews	2012-03-14	1619
DOI	Twitter	http://twitter.com/DOINews	2012-04-09	1689
DOI	Twitter	http://twitter.com/DOINews	2012-04-30	1759
DOI	Twitter	http://twitter.com/DOINews	2012-05-09	3214
DOI	Twitter	http://twitter.com/DOINews	2012-06-13	1885
DOI	Twitter	http://twitter.com/DOINews	2012-07-05	1941
DOI	Twitter	http://twitter.com/DOINews	2012-08-02	1998
DOI	Twitter	http://twitter.com/DOINews	2012-09-21	2180
DOI	Twitter	http://twitter.com/DOINews	2012-10-24	2289
DOI	Twitter	http://twitter.com/DOINews	2012-11-02	2407
DOI	Twitter	http://twitter.com/DOINews	2012-11-09	2458
DOITT	WordPress	http://nycitymap.wordpress.com/	2011-08-08	100
DOITT	WordPress	http://nycitymap.wordpress.com/	2011-09-22	100
DOITT	WordPress	http://nycitymap.wordpress.com/	2011-10-04
DOITT	WordPress	http://nycitymap.wordpress.com/	2011-10-27
DOITT	WordPress	http://nycitymap.wordpress.com/	2011-11-17
DOITT	WordPress	http://nycitymap.wordpress.com/	2012-12-12
DOITT	WordPress	http://nycitymap.wordpress.com/	2011-12-30
DOITT	WordPress	http://nycitymap.wordpress.com/	2012-01-20
DOITT	WordPress	http://nycitymap.wordpress.com/	2012-02-17
DOITT	WordPress	http://nycitymap.wordpress.com/	2012-03-14
DOITT	WordPress	http://nycitymap.wordpress.com/	2012-04-09
DOITT	WordPress	http://nycitymap.wordpress.com/	2012-04-30
DOITT	WordPress	http://nycitymap.wordpress.com/	2012-05-09
DOITT	WordPress	http://nycitymap.wordpress.com/	2012-06-13
DOITT	WordPress	http://nycitymap.wordpress.com/	2012-07-05
DOITT	WordPress	http://nycitymap.wordpress.com/	2012-08-02
DOITT	WordPress	http://nycitymap.wordpress.com/	2012-09-21
DOITT	WordPress	http://nycitymap.wordpress.com/	2012-10-24
DOITT	WordPress	http://nycitymap.wordpress.com/	2012-11-02
DOITT	WordPress	http://nycitymap.wordpress.com/	2012-11-09
NYC IT & Telecomm	Twitter	http://twitter.com/nycdoitt	2011-08-08	1651
NYC IT & Telecomm	Twitter	http://twitter.com/nycdoitt	2011-09-22	1979
NYC IT & Telecomm	Twitter	http://twitter.com/nycdoitt	2011-10-04
NYC IT & Telecomm	Twitter	http://twitter.com/nycdoitt	2011-10-27	2150
NYC IT & Telecomm	Twitter	http://twitter.com/nycdoitt	2011-11-17	2267
NYC IT & Telecomm	Twitter	http://twitter.com/nycdoitt	2012-12-12	2362
NYC IT & Telecomm	Twitter	http://twitter.com/nycdoitt	2011-12-30	2444
NYC IT & Telecomm	Twitter	http://twitter.com/nycdoitt	2012-01-20	2534
NYC IT & Telecomm	Twitter	http://twitter.com/nycdoitt	2012-02-17	2744
NYC IT & Telecomm	Twitter	http://twitter.com/nycdoitt	2012-03-14	2888
NYC IT & Telecomm	Twitter	http://twitter.com/nycdoitt	2012-04-09	3011
NYC IT & Telecomm	Twitter	http://twitter.com/nycdoitt	2012-04-30	3170
NYC IT & Telecomm	Twitter	http://twitter.com/nycdoitt	2012-05-09	15375
NYC IT & Telecomm	Twitter	http://twitter.com/nycdoitt	2012-06-13	3427
NYC IT & Telecomm	Twitter	http://twitter.com/nycdoitt	2012-07-05	3525
NYC IT & Telecomm	Twitter	http://twitter.com/nycdoitt	2012-08-02	3623
NYC IT & Telecomm	Twitter	http://twitter.com/nycdoitt	2012-09-21	3891
NYC IT & Telecomm	Twitter	http://twitter.com/nycdoitt	2012-10-24	4067
NYC IT & Telecomm	Twitter	http://twitter.com/nycdoitt	2012-11-02	4245
NYC IT & Telecomm	Twitter	http://twitter.com/nycdoitt	2012-11-09	4323
NYC IT & Telecomm	Facebook	http://www.facebook.com/pages/New-York-NY/NYC-INFORMATION-TECHNOLOGY-TELECOMMUNICATIONS/104786059565184	2011-08-08	238
NYC IT & Telecomm	Facebook	http://www.facebook.com/pages/New-York-NY/NYC-INFORMATION-TECHNOLOGY-TELECOMMUNICATIONS/104786059565184	2011-09-22	261
NYC IT & Telecomm	Facebook	http://www.facebook.com/pages/New-York-NY/NYC-INFORMATION-TECHNOLOGY-TELECOMMUNICATIONS/104786059565184	2011-10-04	263
NYC IT & Telecomm	Facebook	http://www.facebook.com/pages/New-York-NY/NYC-INFORMATION-TECHNOLOGY-TELECOMMUNICATIONS/104786059565184	2011-10-27	268
NYC IT & Telecomm	Facebook	http://www.facebook.com/pages/New-York-NY/NYC-INFORMATION-TECHNOLOGY-TELECOMMUNICATIONS/104786059565184	2011-11-17	275
NYC IT & Telecomm	Facebook	http://www.facebook.com/pages/New-York-NY/NYC-INFORMATION-TECHNOLOGY-TELECOMMUNICATIONS/104786059565184	2012-12-12	284
NYC IT & Telecomm	Facebook	http://www.facebook.com/pages/New-York-NY/NYC-INFORMATION-TECHNOLOGY-TELECOMMUNICATIONS/104786059565184	2011-12-30	289
NYC IT & Telecomm	Facebook	http://www.facebook.com/pages/New-York-NY/NYC-INFORMATION-TECHNOLOGY-TELECOMMUNICATIONS/104786059565184	2012-01-20	298
NYC IT & Telecomm	Facebook	http://www.facebook.com/pages/New-York-NY/NYC-INFORMATION-TECHNOLOGY-TELECOMMUNICATIONS/104786059565184	2012-02-17
NYC IT & Telecomm	Facebook	http://www.facebook.com/pages/New-York-NY/NYC-INFORMATION-TECHNOLOGY-TELECOMMUNICATIONS/104786059565184	2012-03-14	336
NYC IT & Telecomm	Facebook	http://www.facebook.com/pages/New-York-NY/NYC-INFORMATION-TECHNOLOGY-TELECOMMUNICATIONS/104786059565184	2012-04-09	347
NYC IT & Telecomm	Facebook	http://www.facebook.com/pages/New-York-NY/NYC-INFORMATION-TECHNOLOGY-TELECOMMUNICATIONS/104786059565184	2012-04-30	363
NYC IT & Telecomm	Facebook	http://www.facebook.com/pages/New-York-NY/NYC-INFORMATION-TECHNOLOGY-TELECOMMUNICATIONS/104786059565184	2012-05-09	371
NYC IT & Telecomm	Facebook	http://www.facebook.com/pages/New-York-NY/NYC-INFORMATION-TECHNOLOGY-TELECOMMUNICATIONS/104786059565184	2012-06-13	402
NYC IT & Telecomm	Facebook	http://www.facebook.com/pages/New-York-NY/NYC-INFORMATION-TECHNOLOGY-TELECOMMUNICATIONS/104786059565184	2012-07-05	415
NYC IT & Telecomm	Facebook	http://www.facebook.com/pages/New-York-NY/NYC-INFORMATION-TECHNOLOGY-TELECOMMUNICATIONS/104786059565184	2012-08-02	441
NYC IT & Telecomm	Facebook	http://www.facebook.com/pages/New-York-NY/NYC-INFORMATION-TECHNOLOGY-TELECOMMUNICATIONS/104786059565184	2012-09-21	474
NYC IT & Telecomm	Facebook	http://www.facebook.com/pages/New-York-NY/NYC-INFORMATION-TECHNOLOGY-TELECOMMUNICATIONS/104786059565184	2012-10-24	495
NYC IT & Telecomm	Facebook	http://www.facebook.com/pages/New-York-NY/NYC-INFORMATION-TECHNOLOGY-TELECOMMUNICATIONS/104786059565184	2012-11-02	512
NYC IT & Telecomm	Facebook	http://www.facebook.com/pages/New-York-NY/NYC-INFORMATION-TECHNOLOGY-TELECOMMUNICATIONS/104786059565184	2012-11-09	525
NYC IT & Telecomm	YouTube	http://www.youtube.com/doittnews	2011-08-08	6
NYC IT & Telecomm	YouTube	http://www.youtube.com/doittnews	2011-09-22	9
NYC IT & Telecomm	YouTube	http://www.youtube.com/doittnews	2011-10-04
NYC IT & Telecomm	YouTube	http://www.youtube.com/doittnews	2011-10-27
NYC IT & Telecomm	YouTube	http://www.youtube.com/doittnews	2011-11-17	24
NYC IT & Telecomm	YouTube	http://www.youtube.com/doittnews	2012-12-12	24
NYC IT & Telecomm	YouTube	http://www.youtube.com/doittnews	2011-12-30	24
NYC IT & Telecomm	YouTube	http://www.youtube.com/doittnews	2012-01-20	25
NYC IT & Telecomm	YouTube	http://www.youtube.com/doittnews	2012-02-17	27
NYC IT & Telecomm	YouTube	http://www.youtube.com/doittnews	2012-03-14	28
NYC IT & Telecomm	YouTube	http://www.youtube.com/doittnews	2012-04-09	29
NYC IT & Telecomm	YouTube	http://www.youtube.com/doittnews	2012-04-30	29
NYC IT & Telecomm	YouTube	http://www.youtube.com/doittnews	2012-05-09
NYC IT & Telecomm	YouTube	http://www.youtube.com/doittnews	2012-06-13	30
NYC IT & Telecomm	YouTube	http://www.youtube.com/doittnews	2012-07-05	30
NYC IT & Telecomm	YouTube	http://www.youtube.com/doittnews	2012-08-02	33
NYC IT & Telecomm	YouTube	http://www.youtube.com/doittnews	2012-09-21	33
NYC IT & Telecomm	YouTube	http://www.youtube.com/doittnews	2012-10-24	34
NYC IT & Telecomm	YouTube	http://www.youtube.com/doittnews	2012-11-02	37
NYC IT & Telecomm	YouTube	http://www.youtube.com/doittnews	2012-11-09	37
thedailypothole	Foursquare	http://foursquare.com/user/7474166	2011-08-08
thedailypothole	Foursquare	http://foursquare.com/user/7474166	2011-09-22
thedailypothole	Foursquare	http://foursquare.com/user/7474166	2011-10-04
thedailypothole	Foursquare	http://foursquare.com/user/7474166	2011-10-27	3
thedailypothole	Foursquare	http://foursquare.com/user/7474166	2011-11-17	3
thedailypothole	Foursquare	http://foursquare.com/user/7474166	2012-12-12	3
thedailypothole	Foursquare	http://foursquare.com/user/7474166	2011-12-30	3
thedailypothole	Foursquare	http://foursquare.com/user/7474166	2012-01-20	3
thedailypothole	Foursquare	http://foursquare.com/user/7474166	2012-02-17	4
thedailypothole	Foursquare	http://foursquare.com/user/7474166	2012-03-14	4
thedailypothole	Foursquare	http://foursquare.com/user/7474166	2012-04-09	4
thedailypothole	Foursquare	http://foursquare.com/user/7474166	2012-04-30	4
thedailypothole	Foursquare	http://foursquare.com/user/7474166	2012-05-09	4
thedailypothole	Foursquare	http://foursquare.com/user/7474166	2012-06-13	4
thedailypothole	Foursquare	http://foursquare.com/user/7474166	2012-07-05	4
thedailypothole	Foursquare	http://foursquare.com/user/7474166	2012-08-02	4
thedailypothole	Foursquare	http://foursquare.com/user/7474166	2012-09-21	4
thedailypothole	Foursquare	http://foursquare.com/user/7474166	2012-10-24	4
thedailypothole	Foursquare	http://foursquare.com/user/7474166	2012-11-02	4
thedailypothole	Foursquare	http://foursquare.com/user/7474166	2012-11-09	4
thedailypothole	Tumblr	http://thedailypothole.tumblr.com	2011-08-08	293
thedailypothole	Tumblr	http://thedailypothole.tumblr.com	2011-09-22	293
thedailypothole	Tumblr	http://thedailypothole.tumblr.com	2011-10-04
thedailypothole	Tumblr	http://thedailypothole.tumblr.com	2011-10-27
thedailypothole	Tumblr	http://thedailypothole.tumblr.com	2011-11-17
thedailypothole	Tumblr	http://thedailypothole.tumblr.com	2012-12-12	293
thedailypothole	Tumblr	http://thedailypothole.tumblr.com	2011-12-30	293
thedailypothole	Tumblr	http://thedailypothole.tumblr.com	2012-01-20	293
thedailypothole	Tumblr	http://thedailypothole.tumblr.com	2012-02-17	406
thedailypothole	Tumblr	http://thedailypothole.tumblr.com	2012-03-14	406
thedailypothole	Tumblr	http://thedailypothole.tumblr.com	2012-04-09	406
thedailypothole	Tumblr	http://thedailypothole.tumblr.com	2012-04-30	406
thedailypothole	Tumblr	http://thedailypothole.tumblr.com	2012-05-09	406
thedailypothole	Tumblr	http://thedailypothole.tumblr.com	2012-06-13	3668
thedailypothole	Tumblr	http://thedailypothole.tumblr.com	2012-07-05	3668
thedailypothole	Tumblr	http://thedailypothole.tumblr.com	2012-08-02	3668
thedailypothole	Tumblr	http://thedailypothole.tumblr.com	2012-09-21	3668
thedailypothole	Tumblr	http://thedailypothole.tumblr.com	2012-10-24	10747
thedailypothole	Tumblr	http://thedailypothole.tumblr.com	2012-11-02	10747
thedailypothole	Tumblr	http://thedailypothole.tumblr.com	2012-11-09	10747
DOT (Department of Transportaion)	Twitter	http://twitter.com/NYC_DOT	2011-08-08	9149
DOT (Department of Transportaion)	Twitter	http://twitter.com/NYC_DOT	2011-09-22	10946
DOT (Department of Transportaion)	Twitter	http://twitter.com/NYC_DOT	2011-10-04
DOT (Department of Transportaion)	Twitter	http://twitter.com/NYC_DOT	2011-10-27	11622
DOT (Department of Transportaion)	Twitter	http://twitter.com/NYC_DOT	2011-11-17	12088
DOT (Department of Transportaion)	Twitter	http://twitter.com/NYC_DOT	2012-12-12	12534
DOT (Department of Transportaion)	Twitter	http://twitter.com/NYC_DOT	2011-12-30	12867
DOT (Department of Transportaion)	Twitter	http://twitter.com/NYC_DOT	2012-01-20	13330
DOT (Department of Transportaion)	Twitter	http://twitter.com/NYC_DOT	2012-02-17	13909
DOT (Department of Transportaion)	Twitter	http://twitter.com/NYC_DOT	2012-03-14	14338
DOT (Department of Transportaion)	Twitter	http://twitter.com/NYC_DOT	2012-04-09	14789
DOT (Department of Transportaion)	Twitter	http://twitter.com/NYC_DOT	2012-04-30	15170
DOT (Department of Transportaion)	Twitter	http://twitter.com/NYC_DOT	2012-05-09	944
DOT (Department of Transportaion)	Twitter	http://twitter.com/NYC_DOT	2012-06-13	16182
DOT (Department of Transportaion)	Twitter	http://twitter.com/NYC_DOT	2012-07-05	16525
DOT (Department of Transportaion)	Twitter	http://twitter.com/NYC_DOT	2012-08-02	17006
DOT (Department of Transportaion)	Twitter	http://twitter.com/NYC_DOT	2012-09-21	17964
DOT (Department of Transportaion)	Twitter	http://twitter.com/NYC_DOT	2012-10-24	18584
DOT (Department of Transportaion)	Twitter	http://twitter.com/NYC_DOT	2012-11-02	20385
DOT (Department of Transportaion)	Twitter	http://twitter.com/NYC_DOT	2012-11-09	21262
DOT (Department of Transportaion)	Instagram	http://web.stagram.com/n/nyc_dot	2011-08-08
DOT (Department of Transportaion)	Instagram	http://web.stagram.com/n/nyc_dot	2011-09-22
DOT (Department of Transportaion)	Instagram	http://web.stagram.com/n/nyc_dot	2011-10-04
DOT (Department of Transportaion)	Instagram	http://web.stagram.com/n/nyc_dot	2011-10-27
DOT (Department of Transportaion)	Instagram	http://web.stagram.com/n/nyc_dot	2011-11-17
DOT (Department of Transportaion)	Instagram	http://web.stagram.com/n/nyc_dot	2012-12-12
DOT (Department of Transportaion)	Instagram	http://web.stagram.com/n/nyc_dot	2011-12-30
DOT (Department of Transportaion)	Instagram	http://web.stagram.com/n/nyc_dot	2012-01-20
DOT (Department of Transportaion)	Instagram	http://web.stagram.com/n/nyc_dot	2012-02-17
DOT (Department of Transportaion)	Instagram	http://web.stagram.com/n/nyc_dot	2012-03-14
DOT (Department of Transportaion)	Instagram	http://web.stagram.com/n/nyc_dot	2012-04-09
DOT (Department of Transportaion)	Instagram	http://web.stagram.com/n/nyc_dot	2012-04-30
DOT (Department of Transportaion)	Instagram	http://web.stagram.com/n/nyc_dot	2012-05-09
DOT (Department of Transportaion)	Instagram	http://web.stagram.com/n/nyc_dot	2012-06-13
DOT (Department of Transportaion)	Instagram	http://web.stagram.com/n/nyc_dot	2012-07-05
DOT (Department of Transportaion)	Instagram	http://web.stagram.com/n/nyc_dot	2012-08-02
DOT (Department of Transportaion)	Instagram	http://web.stagram.com/n/nyc_dot	2012-09-21
DOT (Department of Transportaion)	Instagram	http://web.stagram.com/n/nyc_dot	2012-10-24	22
DOT (Department of Transportaion)	Instagram	http://web.stagram.com/n/nyc_dot	2012-11-02	36
DOT (Department of Transportaion)	Instagram	http://web.stagram.com/n/nyc_dot	2012-11-09	36
JanetteSadikKhan (Not Available)	Facebook	http://www.facebook.com/JanetteSadikKhan	2011-08-08	200
JanetteSadikKhan (Not Available)	Facebook	http://www.facebook.com/JanetteSadikKhan	2011-09-22	209
JanetteSadikKhan (Not Available)	Facebook	http://www.facebook.com/JanetteSadikKhan	2011-10-04	209
JanetteSadikKhan (Not Available)	Facebook	http://www.facebook.com/JanetteSadikKhan	2011-10-27	253
JanetteSadikKhan (Not Available)	Facebook	http://www.facebook.com/JanetteSadikKhan	2011-11-17	269
JanetteSadikKhan (Not Available)	Facebook	http://www.facebook.com/JanetteSadikKhan	2012-12-12	307
JanetteSadikKhan (Not Available)	Facebook	http://www.facebook.com/JanetteSadikKhan	2011-12-30	315
JanetteSadikKhan (Not Available)	Facebook	http://www.facebook.com/JanetteSadikKhan	2012-01-20	326
JanetteSadikKhan (Not Available)	Facebook	http://www.facebook.com/JanetteSadikKhan	2012-02-17	341
JanetteSadikKhan (Not Available)	Facebook	http://www.facebook.com/JanetteSadikKhan	2012-03-14	348
JanetteSadikKhan (Not Available)	Facebook	http://www.facebook.com/JanetteSadikKhan	2012-04-09	354
JanetteSadikKhan (Not Available)	Facebook	http://www.facebook.com/JanetteSadikKhan	2012-04-30	360
JanetteSadikKhan (Not Available)	Facebook	http://www.facebook.com/JanetteSadikKhan	2012-05-09	361
JanetteSadikKhan (Not Available)	Facebook	http://www.facebook.com/JanetteSadikKhan	2012-06-13	371
JanetteSadikKhan (Not Available)	Facebook	http://www.facebook.com/JanetteSadikKhan	2012-07-05	377
JanetteSadikKhan (Not Available)	Facebook	http://www.facebook.com/JanetteSadikKhan	2012-08-02	382
JanetteSadikKhan (Not Available)	Facebook	http://www.facebook.com/JanetteSadikKhan	2012-09-21	401
JanetteSadikKhan (Not Available)	Facebook	http://www.facebook.com/JanetteSadikKhan	2012-10-24	421
JanetteSadikKhan (Not Available)	Facebook	http://www.facebook.com/JanetteSadikKhan	2012-11-02	424
JanetteSadikKhan (Not Available)	Facebook	http://www.facebook.com/JanetteSadikKhan	2012-11-09	426
DOT (Department of Transportaion)	Facebook	http://www.facebook.com/NYCDOT	2011-08-08	2784
DOT (Department of Transportaion)	Facebook	http://www.facebook.com/NYCDOT	2011-09-22	3092
DOT (Department of Transportaion)	Facebook	http://www.facebook.com/NYCDOT	2011-10-04	3121
DOT (Department of Transportaion)	Facebook	http://www.facebook.com/NYCDOT	2011-10-27	3181
DOT (Department of Transportaion)	Facebook	http://www.facebook.com/NYCDOT	2011-11-17	3267
DOT (Department of Transportaion)	Facebook	http://www.facebook.com/NYCDOT	2012-12-12	3362
DOT (Department of Transportaion)	Facebook	http://www.facebook.com/NYCDOT	2011-12-30	3404
DOT (Department of Transportaion)	Facebook	http://www.facebook.com/NYCDOT	2012-01-20	3449
DOT (Department of Transportaion)	Facebook	http://www.facebook.com/NYCDOT	2012-02-17
DOT (Department of Transportaion)	Facebook	http://www.facebook.com/NYCDOT	2012-03-14	3630
DOT (Department of Transportaion)	Facebook	http://www.facebook.com/NYCDOT	2012-04-09	3696
DOT (Department of Transportaion)	Facebook	http://www.facebook.com/NYCDOT	2012-04-30	3758
DOT (Department of Transportaion)	Facebook	http://www.facebook.com/NYCDOT	2012-05-09	3880
DOT (Department of Transportaion)	Facebook	http://www.facebook.com/NYCDOT	2012-06-13	4059
DOT (Department of Transportaion)	Facebook	http://www.facebook.com/NYCDOT	2012-07-05	4127
DOT (Department of Transportaion)	Facebook	http://www.facebook.com/NYCDOT	2012-08-02	4220
DOT (Department of Transportaion)	Facebook	http://www.facebook.com/NYCDOT	2012-09-21	4452
DOT (Department of Transportaion)	Facebook	http://www.facebook.com/NYCDOT	2012-10-24	4568
DOT (Department of Transportaion)	Facebook	http://www.facebook.com/NYCDOT	2012-11-02	4827
DOT (Department of Transportaion)	Facebook	http://www.facebook.com/NYCDOT	2012-11-09	4935
You the Man NYC (not available)	Facebook	http://www.facebook.com/YouTheManNYC	2011-08-08	864
You the Man NYC (not available)	Facebook	http://www.facebook.com/YouTheManNYC	2011-09-22	868
You the Man NYC (not available)	Facebook	http://www.facebook.com/YouTheManNYC	2011-10-04	868
You the Man NYC (not available)	Facebook	http://www.facebook.com/YouTheManNYC	2011-10-27	873
You the Man NYC (not available)	Facebook	http://www.facebook.com/YouTheManNYC	2011-11-17	873
You the Man NYC (not available)	Facebook	http://www.facebook.com/YouTheManNYC	2012-12-12	874
You the Man NYC (not available)	Facebook	http://www.facebook.com/YouTheManNYC	2011-12-30	959
You the Man NYC (not available)	Facebook	http://www.facebook.com/YouTheManNYC	2012-01-20	960
You the Man NYC (not available)	Facebook	http://www.facebook.com/YouTheManNYC	2012-02-17	972
You the Man NYC (not available)	Facebook	http://www.facebook.com/YouTheManNYC	2012-03-14	977
You the Man NYC (not available)	Facebook	http://www.facebook.com/YouTheManNYC	2012-04-09	1031
You the Man NYC (not available)	Facebook	http://www.facebook.com/YouTheManNYC	2012-04-30	1037
You the Man NYC (not available)	Facebook	http://www.facebook.com/YouTheManNYC	2012-05-09	1051
You the Man NYC (not available)	Facebook	http://www.facebook.com/YouTheManNYC	2012-06-13	1071
You the Man NYC (not available)	Facebook	http://www.facebook.com/YouTheManNYC	2012-07-05	1090
You the Man NYC (not available)	Facebook	http://www.facebook.com/YouTheManNYC	2012-08-02	1100
You the Man NYC (not available)	Facebook	http://www.facebook.com/YouTheManNYC	2012-09-21	1113
You the Man NYC (not available)	Facebook	http://www.facebook.com/YouTheManNYC	2012-10-24	1122
You the Man NYC (not available)	Facebook	http://www.facebook.com/YouTheManNYC	2012-11-02	1135
You the Man NYC (not available)	Facebook	http://www.facebook.com/YouTheManNYC	2012-11-09	1139
DOT (Department of Transportaion)	Flickr	http://www.flickr.com/photos/nycstreets	2011-08-08
DOT (Department of Transportaion)	Flickr	http://www.flickr.com/photos/nycstreets	2011-09-22
DOT (Department of Transportaion)	Flickr	http://www.flickr.com/photos/nycstreets	2011-10-04
DOT (Department of Transportaion)	Flickr	http://www.flickr.com/photos/nycstreets	2011-10-27
DOT (Department of Transportaion)	Flickr	http://www.flickr.com/photos/nycstreets	2011-11-17
DOT (Department of Transportaion)	Flickr	http://www.flickr.com/photos/nycstreets	2012-12-12
DOT (Department of Transportaion)	Flickr	http://www.flickr.com/photos/nycstreets	2011-12-30
DOT (Department of Transportaion)	Flickr	http://www.flickr.com/photos/nycstreets	2012-01-20
DOT (Department of Transportaion)	Flickr	http://www.flickr.com/photos/nycstreets	2012-02-17
DOT (Department of Transportaion)	Flickr	http://www.flickr.com/photos/nycstreets	2012-03-14
DOT (Department of Transportaion)	Flickr	http://www.flickr.com/photos/nycstreets	2012-04-09
DOT (Department of Transportaion)	Flickr	http://www.flickr.com/photos/nycstreets	2012-04-30
DOT (Department of Transportaion)	Flickr	http://www.flickr.com/photos/nycstreets	2012-05-09
DOT (Department of Transportaion)	Flickr	http://www.flickr.com/photos/nycstreets	2012-06-13
DOT (Department of Transportaion)	Flickr	http://www.flickr.com/photos/nycstreets	2012-07-05
DOT (Department of Transportaion)	Flickr	http://www.flickr.com/photos/nycstreets	2012-08-02
DOT (Department of Transportaion)	Flickr	http://www.flickr.com/photos/nycstreets	2012-09-21
DOT (Department of Transportaion)	Flickr	http://www.flickr.com/photos/nycstreets	2012-10-24
DOT (Department of Transportaion)	Flickr	http://www.flickr.com/photos/nycstreets	2012-11-02
DOT (Department of Transportaion)	Flickr	http://www.flickr.com/photos/nycstreets	2012-11-09
You the Man NYC (not available)	Twitter	http://www.Twitter.com/YouTheManNYC	2011-08-08	440
You the Man NYC (not available)	Twitter	http://www.Twitter.com/YouTheManNYC	2011-09-22	462
You the Man NYC (not available)	Twitter	http://www.Twitter.com/YouTheManNYC	2011-10-04
You the Man NYC (not available)	Twitter	http://www.Twitter.com/YouTheManNYC	2011-10-27	473
You the Man NYC (not available)	Twitter	http://www.Twitter.com/YouTheManNYC	2011-11-17	478
You the Man NYC (not available)	Twitter	http://www.Twitter.com/YouTheManNYC	2012-12-12	476
You the Man NYC (not available)	Twitter	http://www.Twitter.com/YouTheManNYC	2011-12-30	528
You the Man NYC (not available)	Twitter	http://www.Twitter.com/YouTheManNYC	2012-01-20	545
You the Man NYC (not available)	Twitter	http://www.Twitter.com/YouTheManNYC	2012-02-17	545
You the Man NYC (not available)	Twitter	http://www.Twitter.com/YouTheManNYC	2012-03-14	553
You the Man NYC (not available)	Twitter	http://www.Twitter.com/YouTheManNYC	2012-04-09	956
You the Man NYC (not available)	Twitter	http://www.Twitter.com/YouTheManNYC	2012-04-30	948
You the Man NYC (not available)	Twitter	http://www.Twitter.com/YouTheManNYC	2012-05-09	23969
You the Man NYC (not available)	Twitter	http://www.Twitter.com/YouTheManNYC	2012-06-13	933
You the Man NYC (not available)	Twitter	http://www.Twitter.com/YouTheManNYC	2012-07-05	935
You the Man NYC (not available)	Twitter	http://www.Twitter.com/YouTheManNYC	2012-08-02	927
You the Man NYC (not available)	Twitter	http://www.Twitter.com/YouTheManNYC	2012-09-21	927
You the Man NYC (not available)	Twitter	http://www.Twitter.com/YouTheManNYC	2012-10-24	920
You the Man NYC (not available)	Twitter	http://www.Twitter.com/YouTheManNYC	2012-11-02	940
You the Man NYC (not available)	Twitter	http://www.Twitter.com/YouTheManNYC	2012-11-09	941
DOT (Department of Transportaion)	YouTube	http://www.youtube.com/NYCDOT	2011-08-08	290
DOT (Department of Transportaion)	YouTube	http://www.youtube.com/NYCDOT	2011-09-22	303
DOT (Department of Transportaion)	YouTube	http://www.youtube.com/NYCDOT	2011-10-04	312
DOT (Department of Transportaion)	YouTube	http://www.youtube.com/NYCDOT	2011-10-27
DOT (Department of Transportaion)	YouTube	http://www.youtube.com/NYCDOT	2011-11-17	315
DOT (Department of Transportaion)	YouTube	http://www.youtube.com/NYCDOT	2012-12-12	318
DOT (Department of Transportaion)	YouTube	http://www.youtube.com/NYCDOT	2011-12-30	324
DOT (Department of Transportaion)	YouTube	http://www.youtube.com/NYCDOT	2012-01-20	326
DOT (Department of Transportaion)	YouTube	http://www.youtube.com/NYCDOT	2012-02-17	323
DOT (Department of Transportaion)	YouTube	http://www.youtube.com/NYCDOT	2012-03-14	324
DOT (Department of Transportaion)	YouTube	http://www.youtube.com/NYCDOT	2012-04-09	328
DOT (Department of Transportaion)	YouTube	http://www.youtube.com/NYCDOT	2012-04-30	330
DOT (Department of Transportaion)	YouTube	http://www.youtube.com/NYCDOT	2012-05-09
DOT (Department of Transportaion)	YouTube	http://www.youtube.com/NYCDOT	2012-06-13	322
DOT (Department of Transportaion)	YouTube	http://www.youtube.com/NYCDOT	2012-07-05	331
DOT (Department of Transportaion)	YouTube	http://www.youtube.com/NYCDOT	2012-08-02	333
DOT (Department of Transportaion)	YouTube	http://www.youtube.com/NYCDOT	2012-09-21	350
DOT (Department of Transportaion)	YouTube	http://www.youtube.com/NYCDOT	2012-10-24	369
DOT (Department of Transportaion)	YouTube	http://www.youtube.com/NYCDOT	2012-11-02	381
DOT (Department of Transportaion)	YouTube	http://www.youtube.com/NYCDOT	2012-11-09	381
You the Man NYC	Android	You The Man	2011-08-08
You the Man NYC	iPhone app	You The Man	2011-08-08	2635
You the Man NYC	Android	You The Man	2011-09-22
You the Man NYC	iPhone app	You The Man	2011-09-22	2635
You the Man NYC	Android	You The Man	2011-10-04
You the Man NYC	iPhone app	You The Man	2011-10-04
You the Man NYC	Android	You The Man	2011-10-27
You the Man NYC	iPhone app	You The Man	2011-10-27
You the Man NYC	Android	You The Man	2011-11-17
You the Man NYC	iPhone app	You The Man	2011-11-17	2635
You the Man NYC	Android	You The Man	2012-12-12
You the Man NYC	iPhone app	You The Man	2012-12-12	2635
You the Man NYC	Android	You The Man	2011-12-30
You the Man NYC	iPhone app	You The Man	2011-12-30	2635
You the Man NYC	Android	You The Man	2012-01-20
You the Man NYC	Android	You The Man	2012-10-24	102
You the Man NYC	iPhone app	You The Man	2012-01-20	2635
You the Man NYC	Android	You The Man	2012-02-17
You the Man NYC	iPhone app	You The Man	2012-02-17	2635
You the Man NYC	Android	You The Man	2012-03-14
You the Man NYC	iPhone app	You The Man	2012-03-14	2635
You the Man NYC	Android	You The Man	2012-04-09
You the Man NYC	iPhone app	You The Man	2012-04-09	2635
You the Man NYC	iPhone app	You The Man	2012-04-30	2598
You the Man NYC	Android	You The Man	2012-04-30	38
You the Man NYC	Android	You The Man	2012-07-05	102
You the Man NYC	Android	You The Man	2012-05-09	38
You the Man NYC	iPhone app	You The Man	2012-05-09	2598
You the Man NYC	Android	You The Man	2012-06-13	102
You the Man NYC	iPhone app	You The Man	2012-06-13	2713
You the Man NYC	iPhone app	You The Man	2012-07-05	2713
You the Man NYC	Android	You The Man	2012-08-02	102
You the Man NYC	iPhone app	You The Man	2012-08-02	2713
You the Man NYC	Android	You The Man	2012-09-21	102
You the Man NYC	iPhone app	You The Man	2012-09-21	2713
You the Man NYC	Android	You The Man	2012-11-02	102
You the Man NYC	iPhone app	You The Man	2012-10-24	2713
You the Man NYC	iPhone app	You The Man	2012-11-02	2713
You the Man NYC	Android	You The Man	2012-11-09	102
You the Man NYC	iPhone app	You The Man	2012-11-09	2713
DOT	Newsletter		2011-08-08	72614
DOT	Newsletter		2011-09-22	72614
DOT	Newsletter		2011-11-17	72614
DOT	Newsletter		2011-10-04
DOT	Newsletter		2011-10-27	9811
DOT	Newsletter		2012-12-12	72614
DOT	Newsletter		2011-12-30	72614
DOT	Newsletter		2012-01-20	72614
DOT	Newsletter		2012-02-17	72614
DOT	Newsletter		2012-03-14	72614
DOT	Newsletter		2012-04-09	72614
DOT	Newsletter		2012-04-30	72614
DOT	Newsletter		2012-05-09	72614
DOT	Newsletter		2012-06-13	80831
DOT	Newsletter		2012-07-05	80831
DOT	Newsletter		2012-08-02	80831
DOT	Newsletter		2012-09-21	80831
DOT	Newsletter		2012-10-24	80831
DOT	Newsletter		2012-11-02	80831
DOT	Newsletter		2012-11-09	80831
NYC Parks	Twitter	http://twitter.com/NYCParks	2011-08-08	14873
NYC Parks	Twitter	http://twitter.com/NYCParks	2011-09-22	17118
NYC Parks	Twitter	http://twitter.com/NYCParks	2011-10-04
NYC Parks	Twitter	http://twitter.com/NYCParks	2011-10-27	18190
NYC Parks	Twitter	http://twitter.com/NYCParks	2011-11-17	18824
NYC Parks	Twitter	http://twitter.com/NYCParks	2012-12-12	19454
NYC Parks	Twitter	http://twitter.com/NYCParks	2011-12-30	19841
NYC Parks	Twitter	http://twitter.com/NYCParks	2012-01-20	20526
NYC Parks	Twitter	http://twitter.com/NYCParks	2012-02-17	21509
NYC Parks	Twitter	http://twitter.com/NYCParks	2012-03-14	22303
NYC Parks	Twitter	http://twitter.com/NYCParks	2012-04-09	23027
NYC Parks	Twitter	http://twitter.com/NYCParks	2012-04-30	23721
NYC Parks	Twitter	http://twitter.com/NYCParks	2012-05-09	257
NYC Parks	Twitter	http://twitter.com/NYCParks	2012-06-13	25651
NYC Parks	Twitter	http://twitter.com/NYCParks	2012-07-05	24496
NYC Parks	Twitter	http://twitter.com/NYCParks	2012-08-02	27477
NYC Parks	Twitter	http://twitter.com/NYCParks	2012-09-21	29141
NYC Parks	Twitter	http://twitter.com/NYCParks	2012-10-24	30000
NYC Parks	Twitter	http://twitter.com/NYCParks	2012-11-02	31170
NYC Parks	Twitter	http://twitter.com/NYCParks	2012-11-09	31950
NYC Parks	Facebook	http://www.facebook.com/nycparks	2011-08-08	9400
NYC Parks	Facebook	http://www.facebook.com/nycparks	2011-09-22	10644
NYC Parks	Facebook	http://www.facebook.com/nycparks	2011-10-04	10871
NYC Parks	Facebook	http://www.facebook.com/nycparks	2011-10-27	11422
NYC Parks	Facebook	http://www.facebook.com/nycparks	2011-11-17	11756
NYC Parks	Facebook	http://www.facebook.com/nycparks	2012-12-12	12020
NYC Parks	Facebook	http://www.facebook.com/nycparks	2011-12-30	12096
NYC Parks	Facebook	http://www.facebook.com/nycparks	2012-01-20	12291
NYC Parks	Facebook	http://www.facebook.com/nycparks	2012-02-17
NYC Parks	Facebook	http://www.facebook.com/nycparks	2012-03-14	12979
NYC Parks	Facebook	http://www.facebook.com/nycparks	2012-04-09	13339
NYC Parks	Facebook	http://www.facebook.com/nycparks	2012-04-30	13803
NYC Parks	Facebook	http://www.facebook.com/nycparks	2012-05-09	13992
NYC Parks	Facebook	http://www.facebook.com/nycparks	2012-06-13	15375
NYC Parks	Facebook	http://www.facebook.com/nycparks	2012-07-05	16436
NYC Parks	Facebook	http://www.facebook.com/nycparks	2012-08-02	17286
NYC Parks	Facebook	http://www.facebook.com/nycparks	2012-09-21	18447
NYC Parks	Facebook	http://www.facebook.com/nycparks	2012-10-24	19087
NYC Parks	Facebook	http://www.facebook.com/nycparks	2012-11-02	19496
NYC Parks	Facebook	http://www.facebook.com/nycparks	2012-11-09	19726
Pearl_Squirrel (not available)	Twitter	http://www.twitter.com/Pearl_Squirrel	2011-08-08	140
Pearl_Squirrel (not available)	Twitter	http://www.twitter.com/Pearl_Squirrel	2011-09-22	163
Pearl_Squirrel (not available)	Twitter	http://www.twitter.com/Pearl_Squirrel	2011-10-04
Pearl_Squirrel (not available)	Twitter	http://www.twitter.com/Pearl_Squirrel	2011-10-27	172
Pearl_Squirrel (not available)	Twitter	http://www.twitter.com/Pearl_Squirrel	2011-11-17	183
Pearl_Squirrel (not available)	Twitter	http://www.twitter.com/Pearl_Squirrel	2012-12-12	189
Pearl_Squirrel (not available)	Twitter	http://www.twitter.com/Pearl_Squirrel	2011-12-30	195
Pearl_Squirrel (not available)	Twitter	http://www.twitter.com/Pearl_Squirrel	2012-01-20	212
Pearl_Squirrel (not available)	Twitter	http://www.twitter.com/Pearl_Squirrel	2012-02-17	224
Pearl_Squirrel (not available)	Twitter	http://www.twitter.com/Pearl_Squirrel	2012-03-14	228
Pearl_Squirrel (not available)	Twitter	http://www.twitter.com/Pearl_Squirrel	2012-04-09	241
Pearl_Squirrel (not available)	Twitter	http://www.twitter.com/Pearl_Squirrel	2012-04-30	253
Pearl_Squirrel (not available)	Twitter	http://www.twitter.com/Pearl_Squirrel	2012-05-09	36
Pearl_Squirrel (not available)	Twitter	http://www.twitter.com/Pearl_Squirrel	2012-06-13	272
Pearl_Squirrel (not available)	Twitter	http://www.twitter.com/Pearl_Squirrel	2012-07-05	280
Pearl_Squirrel (not available)	Twitter	http://www.twitter.com/Pearl_Squirrel	2012-08-02	287
Pearl_Squirrel (not available)	Twitter	http://www.twitter.com/Pearl_Squirrel	2012-09-21	296
Pearl_Squirrel (not available)	Twitter	http://www.twitter.com/Pearl_Squirrel	2012-10-24	309
Pearl_Squirrel (not available)	Twitter	http://www.twitter.com/Pearl_Squirrel	2012-11-02	317
Pearl_Squirrel (not available)	Twitter	http://www.twitter.com/Pearl_Squirrel	2012-11-09	317
NYC Parks	YouTube	http://www.youtube.com/user/NYCParksDepartment	2011-08-08	163
NYC Parks	YouTube	http://www.youtube.com/user/NYCParksDepartment	2011-09-22	181
NYC Parks	YouTube	http://www.youtube.com/user/NYCParksDepartment	2011-10-04	190
NYC Parks	YouTube	http://www.youtube.com/user/NYCParksDepartment	2011-10-27
NYC Parks	YouTube	http://www.youtube.com/user/NYCParksDepartment	2011-11-17	190
NYC Parks	YouTube	http://www.youtube.com/user/NYCParksDepartment	2012-12-12	196
NYC Parks	YouTube	http://www.youtube.com/user/NYCParksDepartment	2011-12-30	202
NYC Parks	YouTube	http://www.youtube.com/user/NYCParksDepartment	2012-01-20	210
NYC Parks	YouTube	http://www.youtube.com/user/NYCParksDepartment	2012-02-17	215
NYC Parks	YouTube	http://www.youtube.com/user/NYCParksDepartment	2012-03-14	231
NYC Parks	YouTube	http://www.youtube.com/user/NYCParksDepartment	2012-04-09	237
NYC Parks	YouTube	http://www.youtube.com/user/NYCParksDepartment	2012-04-30	240
NYC Parks	YouTube	http://www.youtube.com/user/NYCParksDepartment	2012-05-09
NYC Parks	YouTube	http://www.youtube.com/user/NYCParksDepartment	2012-06-13	251
NYC Parks	YouTube	http://www.youtube.com/user/NYCParksDepartment	2012-07-05	260
NYC Parks	YouTube	http://www.youtube.com/user/NYCParksDepartment	2012-08-02	266
NYC Parks	YouTube	http://www.youtube.com/user/NYCParksDepartment	2012-09-21	275
NYC Parks	YouTube	http://www.youtube.com/user/NYCParksDepartment	2012-10-24	297
NYC Parks	YouTube	http://www.youtube.com/user/NYCParksDepartment	2012-11-02	311
NYC Parks	YouTube	http://www.youtube.com/user/NYCParksDepartment	2012-11-09	311
NYC Parks	Foursquare	https://foursquare.com/nycparks	2011-08-08
NYC Parks	Foursquare	https://foursquare.com/nycparks	2011-09-22
NYC Parks	Foursquare	https://foursquare.com/nycparks	2011-10-04	7568
NYC Parks	Foursquare	https://foursquare.com/nycparks	2011-10-27	7774
NYC Parks	Foursquare	https://foursquare.com/nycparks	2011-11-17	8392
NYC Parks	Foursquare	https://foursquare.com/nycparks	2012-12-12	8887
NYC Parks	Foursquare	https://foursquare.com/nycparks	2011-12-30	9156
NYC Parks	Foursquare	https://foursquare.com/nycparks	2012-01-20	9474
NYC Parks	Foursquare	https://foursquare.com/nycparks	2012-02-17	9878
NYC Parks	Foursquare	https://foursquare.com/nycparks	2012-03-14	10286
NYC Parks	Foursquare	https://foursquare.com/nycparks	2012-04-09	10619
NYC Parks	Foursquare	https://foursquare.com/nycparks	2012-04-30	10943
NYC Parks	Foursquare	https://foursquare.com/nycparks	2012-05-09	11054
NYC Parks	Foursquare	https://foursquare.com/nycparks	2012-06-13	12244
NYC Parks	Foursquare	https://foursquare.com/nycparks	2012-07-05	13779
NYC Parks	Foursquare	https://foursquare.com/nycparks	2012-08-02	15469
NYC Parks	Foursquare	https://foursquare.com/nycparks	2012-09-21	17424
NYC Parks	Foursquare	https://foursquare.com/nycparks	2012-10-24	18369
NYC Parks	Foursquare	https://foursquare.com/nycparks	2012-11-02	18672
NYC Parks	Foursquare	https://foursquare.com/nycparks	2012-11-09	18672
NYC Department of Records	Pinterest	http://pinterest.com/recordsnyc	2011-08-08
NYC Department of Records	Pinterest	http://pinterest.com/recordsnyc	2011-09-22
NYC Department of Records	Pinterest	http://pinterest.com/recordsnyc	2011-10-04
NYC Department of Records	Pinterest	http://pinterest.com/recordsnyc	2011-10-27
NYC Department of Records	Pinterest	http://pinterest.com/recordsnyc	2011-11-17
NYC Department of Records	Pinterest	http://pinterest.com/recordsnyc	2012-12-12
NYC Department of Records	Pinterest	http://pinterest.com/recordsnyc	2011-12-30
NYC Department of Records	Pinterest	http://pinterest.com/recordsnyc	2012-01-20
NYC Department of Records	Pinterest	http://pinterest.com/recordsnyc	2012-02-17
NYC Department of Records	Pinterest	http://pinterest.com/recordsnyc	2012-03-14
NYC Department of Records	Pinterest	http://pinterest.com/recordsnyc	2012-04-09
NYC Department of Records	Pinterest	http://pinterest.com/recordsnyc	2012-04-30
NYC Department of Records	Pinterest	http://pinterest.com/recordsnyc	2012-05-09
NYC Department of Records	Pinterest	http://pinterest.com/recordsnyc	2012-06-13
NYC Department of Records	Pinterest	http://pinterest.com/recordsnyc	2012-07-05
NYC Department of Records	Pinterest	http://pinterest.com/recordsnyc	2012-08-02
NYC Department of Records	Pinterest	http://pinterest.com/recordsnyc	2012-09-21
NYC Department of Records	Pinterest	http://pinterest.com/recordsnyc	2012-10-24	0
NYC Department of Records	Pinterest	http://pinterest.com/recordsnyc	2012-11-02	1
NYC Department of Records	Pinterest	http://pinterest.com/recordsnyc	2012-11-09	1
Mayor Ed Koch	Facebook	http://www.facebook.com/MayorEdKochNYCRecords	2011-08-08
Mayor Ed Koch	Facebook	http://www.facebook.com/MayorEdKochNYCRecords	2011-09-22
Mayor Ed Koch	Facebook	http://www.facebook.com/MayorEdKochNYCRecords	2011-10-04
Mayor Ed Koch	Facebook	http://www.facebook.com/MayorEdKochNYCRecords	2011-10-27
Mayor Ed Koch	Facebook	http://www.facebook.com/MayorEdKochNYCRecords	2011-11-17
Mayor Ed Koch	Facebook	http://www.facebook.com/MayorEdKochNYCRecords	2012-12-12
Mayor Ed Koch	Facebook	http://www.facebook.com/MayorEdKochNYCRecords	2011-12-30
Mayor Ed Koch	Facebook	http://www.facebook.com/MayorEdKochNYCRecords	2012-01-20
Mayor Ed Koch	Facebook	http://www.facebook.com/MayorEdKochNYCRecords	2012-02-17
Mayor Ed Koch	Facebook	http://www.facebook.com/MayorEdKochNYCRecords	2012-03-14
Mayor Ed Koch	Facebook	http://www.facebook.com/MayorEdKochNYCRecords	2012-04-09
Mayor Ed Koch	Facebook	http://www.facebook.com/MayorEdKochNYCRecords	2012-04-30
Mayor Ed Koch	Facebook	http://www.facebook.com/MayorEdKochNYCRecords	2012-05-09
Mayor Ed Koch	Facebook	http://www.facebook.com/MayorEdKochNYCRecords	2012-06-13
Mayor Ed Koch	Facebook	http://www.facebook.com/MayorEdKochNYCRecords	2012-07-05
Mayor Ed Koch	Facebook	http://www.facebook.com/MayorEdKochNYCRecords	2012-08-02	45
Mayor Ed Koch	Facebook	http://www.facebook.com/MayorEdKochNYCRecords	2012-09-21	88
Mayor Ed Koch	Facebook	http://www.facebook.com/MayorEdKochNYCRecords	2012-10-24	107
Mayor Ed Koch	Facebook	http://www.facebook.com/MayorEdKochNYCRecords	2012-11-02	138
Mayor Ed Koch	Facebook	http://www.facebook.com/MayorEdKochNYCRecords	2012-11-09	145
Mayor Fiorello LaGuardia	Facebook	http://www.facebook.com/MayorFiorelloLaGuardiaNYCRecords	2011-08-08
Mayor Fiorello LaGuardia	Facebook	http://www.facebook.com/MayorFiorelloLaGuardiaNYCRecords	2011-09-22
Mayor Fiorello LaGuardia	Facebook	http://www.facebook.com/MayorFiorelloLaGuardiaNYCRecords	2011-10-04
Mayor Fiorello LaGuardia	Facebook	http://www.facebook.com/MayorFiorelloLaGuardiaNYCRecords	2011-10-27
Mayor Fiorello LaGuardia	Facebook	http://www.facebook.com/MayorFiorelloLaGuardiaNYCRecords	2011-11-17
Mayor Fiorello LaGuardia	Facebook	http://www.facebook.com/MayorFiorelloLaGuardiaNYCRecords	2012-12-12
Mayor Fiorello LaGuardia	Facebook	http://www.facebook.com/MayorFiorelloLaGuardiaNYCRecords	2011-12-30
Mayor Fiorello LaGuardia	Facebook	http://www.facebook.com/MayorFiorelloLaGuardiaNYCRecords	2012-01-20
Mayor Fiorello LaGuardia	Facebook	http://www.facebook.com/MayorFiorelloLaGuardiaNYCRecords	2012-02-17
Mayor Fiorello LaGuardia	Facebook	http://www.facebook.com/MayorFiorelloLaGuardiaNYCRecords	2012-03-14
Mayor Fiorello LaGuardia	Facebook	http://www.facebook.com/MayorFiorelloLaGuardiaNYCRecords	2012-04-09
Mayor Fiorello LaGuardia	Facebook	http://www.facebook.com/MayorFiorelloLaGuardiaNYCRecords	2012-04-30
Mayor Fiorello LaGuardia	Facebook	http://www.facebook.com/MayorFiorelloLaGuardiaNYCRecords	2012-05-09
Mayor Fiorello LaGuardia	Facebook	http://www.facebook.com/MayorFiorelloLaGuardiaNYCRecords	2012-06-13
Mayor Fiorello LaGuardia	Facebook	http://www.facebook.com/MayorFiorelloLaGuardiaNYCRecords	2012-07-05
Mayor Fiorello LaGuardia	Facebook	http://www.facebook.com/MayorFiorelloLaGuardiaNYCRecords	2012-08-02	35
Mayor Fiorello LaGuardia	Facebook	http://www.facebook.com/MayorFiorelloLaGuardiaNYCRecords	2012-09-21	75
Mayor Fiorello LaGuardia	Facebook	http://www.facebook.com/MayorFiorelloLaGuardiaNYCRecords	2012-10-24	102
Mayor Fiorello LaGuardia	Facebook	http://www.facebook.com/MayorFiorelloLaGuardiaNYCRecords	2012-11-02	119
Mayor Fiorello LaGuardia	Facebook	http://www.facebook.com/MayorFiorelloLaGuardiaNYCRecords	2012-11-09	123
Mayor John Lindsay	Facebook	http://www.facebook.com/MayorJohnLindsayNYCRecords	2011-08-08
Mayor John Lindsay	Facebook	http://www.facebook.com/MayorJohnLindsayNYCRecords	2011-09-22
Mayor John Lindsay	Facebook	http://www.facebook.com/MayorJohnLindsayNYCRecords	2011-10-04
Mayor John Lindsay	Facebook	http://www.facebook.com/MayorJohnLindsayNYCRecords	2011-10-27
Mayor John Lindsay	Facebook	http://www.facebook.com/MayorJohnLindsayNYCRecords	2011-11-17
Mayor John Lindsay	Facebook	http://www.facebook.com/MayorJohnLindsayNYCRecords	2012-12-12
Mayor John Lindsay	Facebook	http://www.facebook.com/MayorJohnLindsayNYCRecords	2011-12-30
Mayor John Lindsay	Facebook	http://www.facebook.com/MayorJohnLindsayNYCRecords	2012-01-20
Mayor John Lindsay	Facebook	http://www.facebook.com/MayorJohnLindsayNYCRecords	2012-02-17
Mayor John Lindsay	Facebook	http://www.facebook.com/MayorJohnLindsayNYCRecords	2012-03-14
Mayor John Lindsay	Facebook	http://www.facebook.com/MayorJohnLindsayNYCRecords	2012-04-09
Mayor John Lindsay	Facebook	http://www.facebook.com/MayorJohnLindsayNYCRecords	2012-04-30
Mayor John Lindsay	Facebook	http://www.facebook.com/MayorJohnLindsayNYCRecords	2012-05-09
Mayor John Lindsay	Facebook	http://www.facebook.com/MayorJohnLindsayNYCRecords	2012-06-13
Mayor John Lindsay	Facebook	http://www.facebook.com/MayorJohnLindsayNYCRecords	2012-07-05
Mayor John Lindsay	Facebook	http://www.facebook.com/MayorJohnLindsayNYCRecords	2012-08-02	33
Mayor John Lindsay	Facebook	http://www.facebook.com/MayorJohnLindsayNYCRecords	2012-09-21	60
Mayor John Lindsay	Facebook	http://www.facebook.com/MayorJohnLindsayNYCRecords	2012-10-24	81
Mayor John Lindsay	Facebook	http://www.facebook.com/MayorJohnLindsayNYCRecords	2012-11-02	97
[truncated: 3,280 more rows]
